# Supplementary material for: New Inhibitors of Respiratory Syncytial Virus (RSV) Replication Based on Monoterpene-Substituted Arylcoumarins
Source: MDPI journal article supplement (doi:10.3390/molecules28062673), 2023-03-15
Supplement: s1 [file s1]

## New Inhibitors of Respiratory Syncytial Virus (RSV) Replication Based on Monoterpene-Substituted Arylcoumarins

Tatyana M. Khomenko <sup>1</sup>, Anna A. Shtro <sup>2</sup>, Anastasia V. Galochkina <sup>2</sup>, Yulia V. Nikolaeva <sup>2</sup>, Anzhelika V. Garshinina <sup>2</sup>, Sophia S. Borisevich <sup>3,4</sup>, Dina V. Korchagina <sup>1</sup>, Konstantin P. Volcho <sup>1,\*</sup> and Nariman F. Salakhutdinov <sup>1</sup>

<sup>1</sup> Department of Medicinal Chemistry, N.N. Vorozhtsov Novosibirsk Institute of Organic Chemistry, Acad. Lavrentjev Ave. 9, 630090 Novosibirsk, Russia

<sup>2</sup> Laboratory of chemotherapy for viral infections, Smorodintsev Research Institute of Influenza, 197376 Saint-Petersburg, Russia

<sup>3</sup> Laboratory of Physical Chemistry, Ufa Chemistry Institute of the Ufa Federal Research Center, 71 Octyabrya pr., 450054 Ufa, Russia

<sup>4</sup> Institute of Cyber Intelligence Systems, National Research Nuclear University MEPhI, 115409 Moscow, Russia

\* Correspondence: volcho@nioch.nsc.ru

1. NMR <sup>1</sup>H and <sup>13</sup>C spectra of the compounds **14-17**, **21** and **22**.
2. Table S1: Analysis of structural descriptors and pharmacophoric features of the ligand as a function of linker length.
3. Table S2: Analysis of structural descriptors and pharmacophoric features of the ligand as a function of the nature of the substituent
4. Table S3: Analysis of structural descriptors and pharmacophoric features of the different stereoisomers
5. Table S4: Molecular docking results
6. Figure S1: RMSD fluctuations
7. Figure S2: The total number of protein-ligand contacts

Compound **14a**

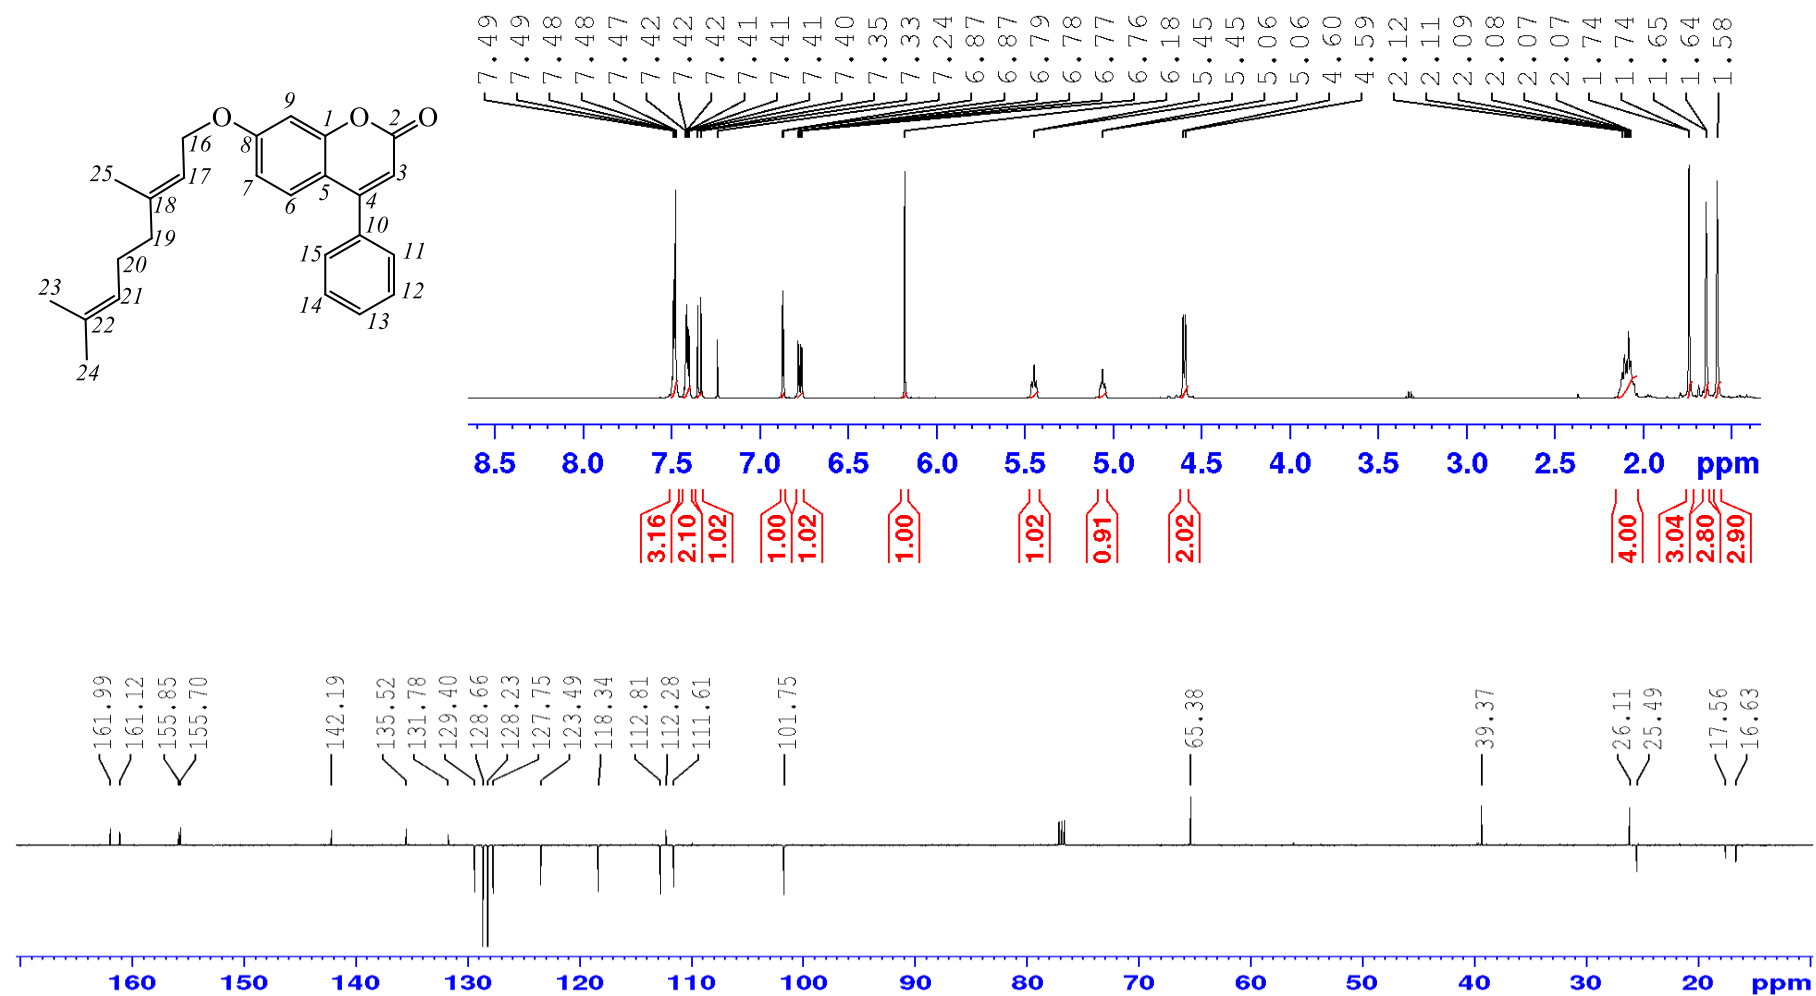

Compound **14b**

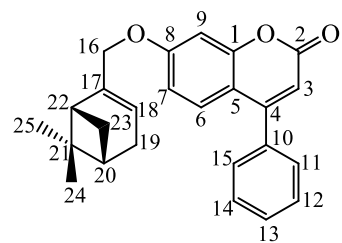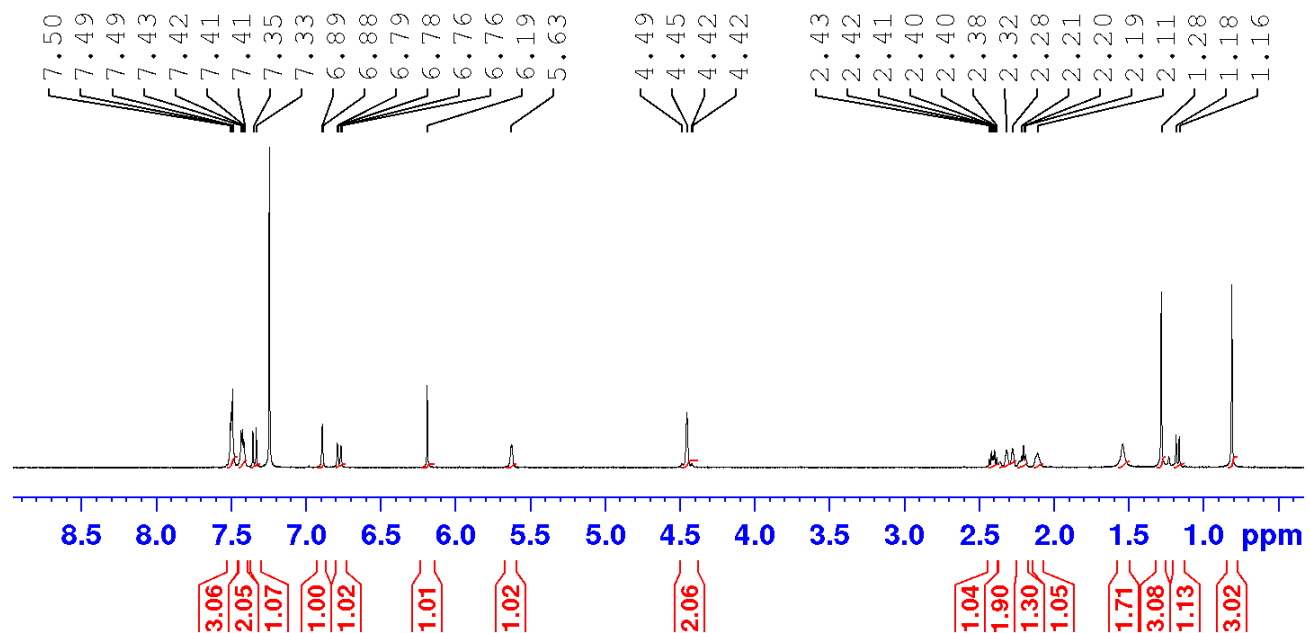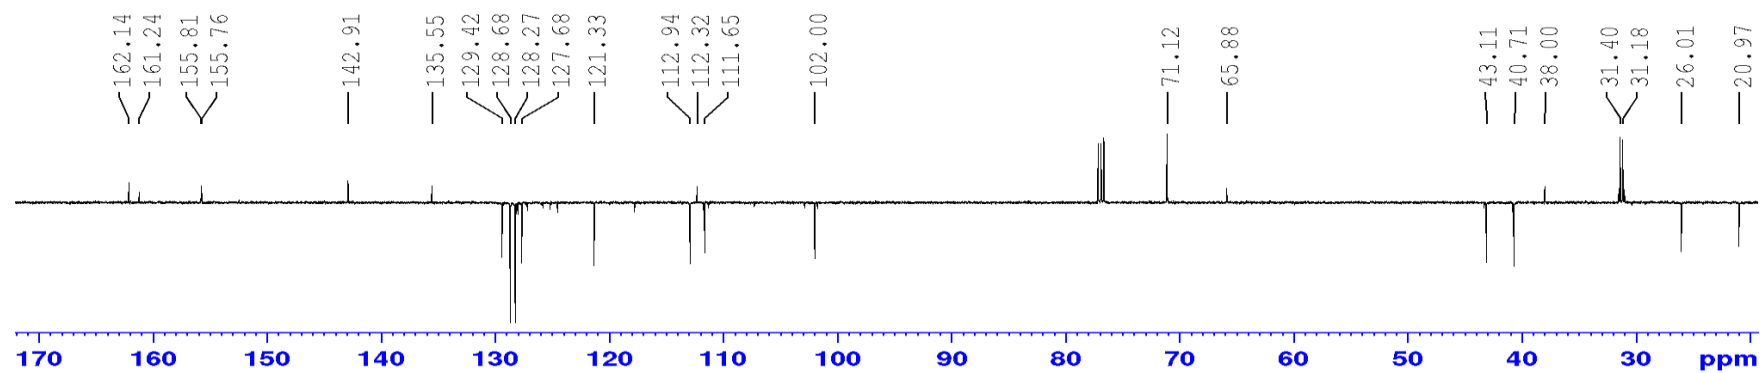

Compound **14d**

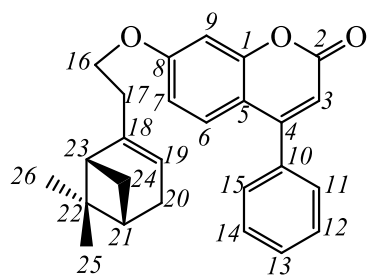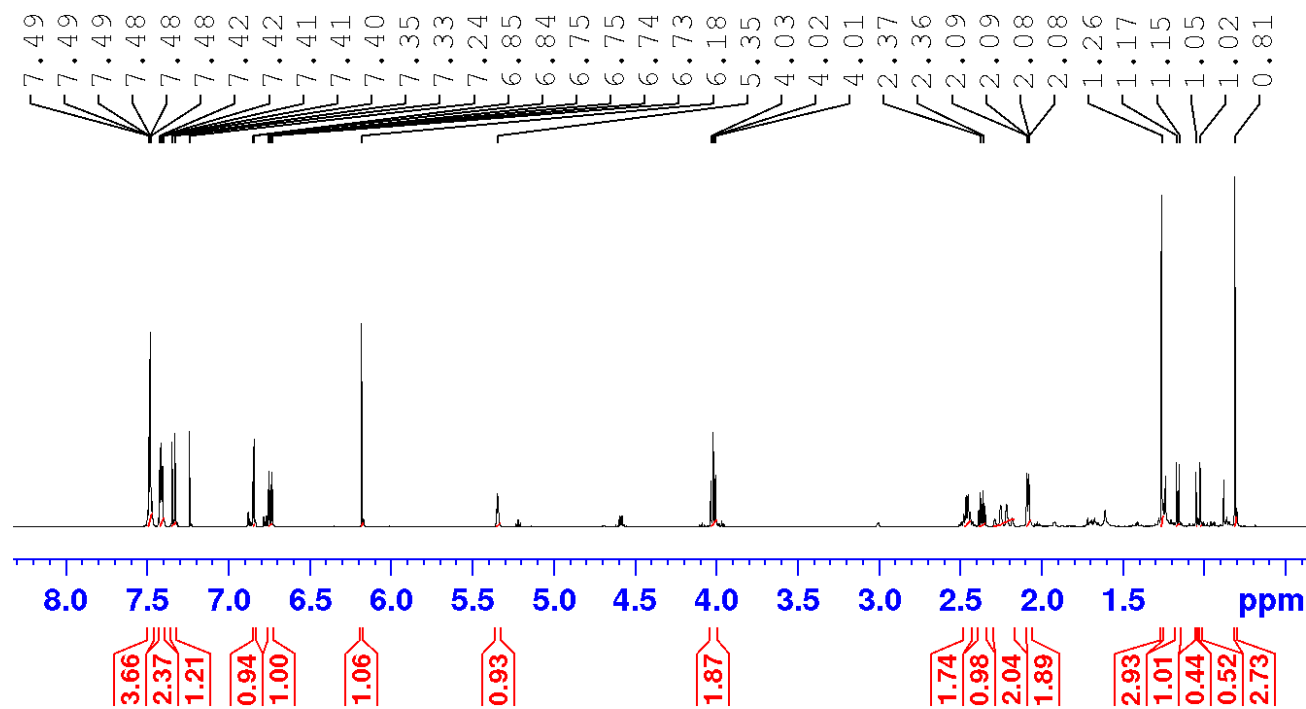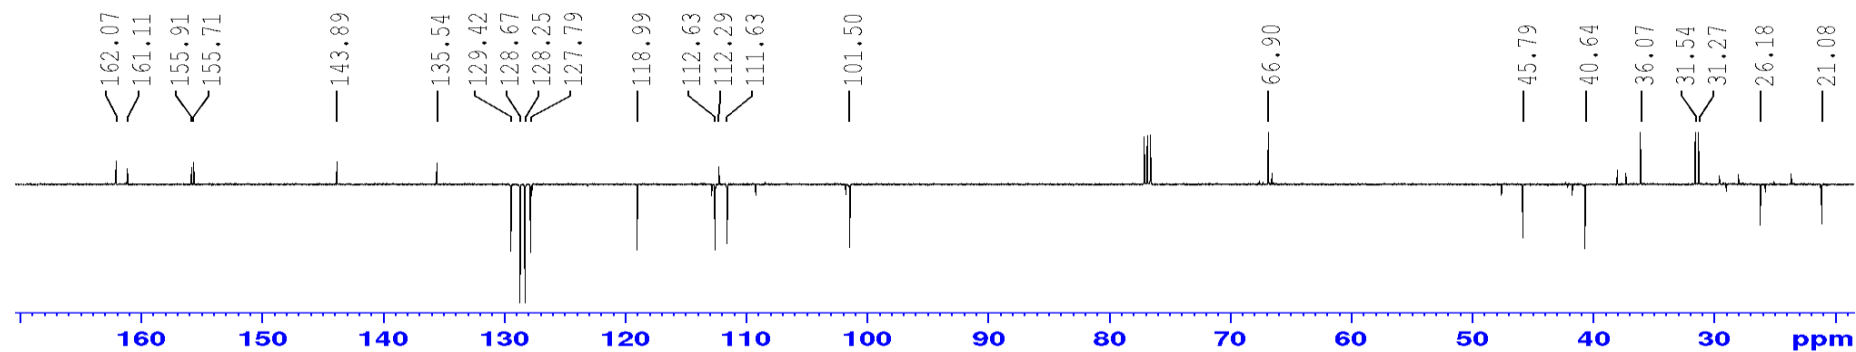

Compound **14e**

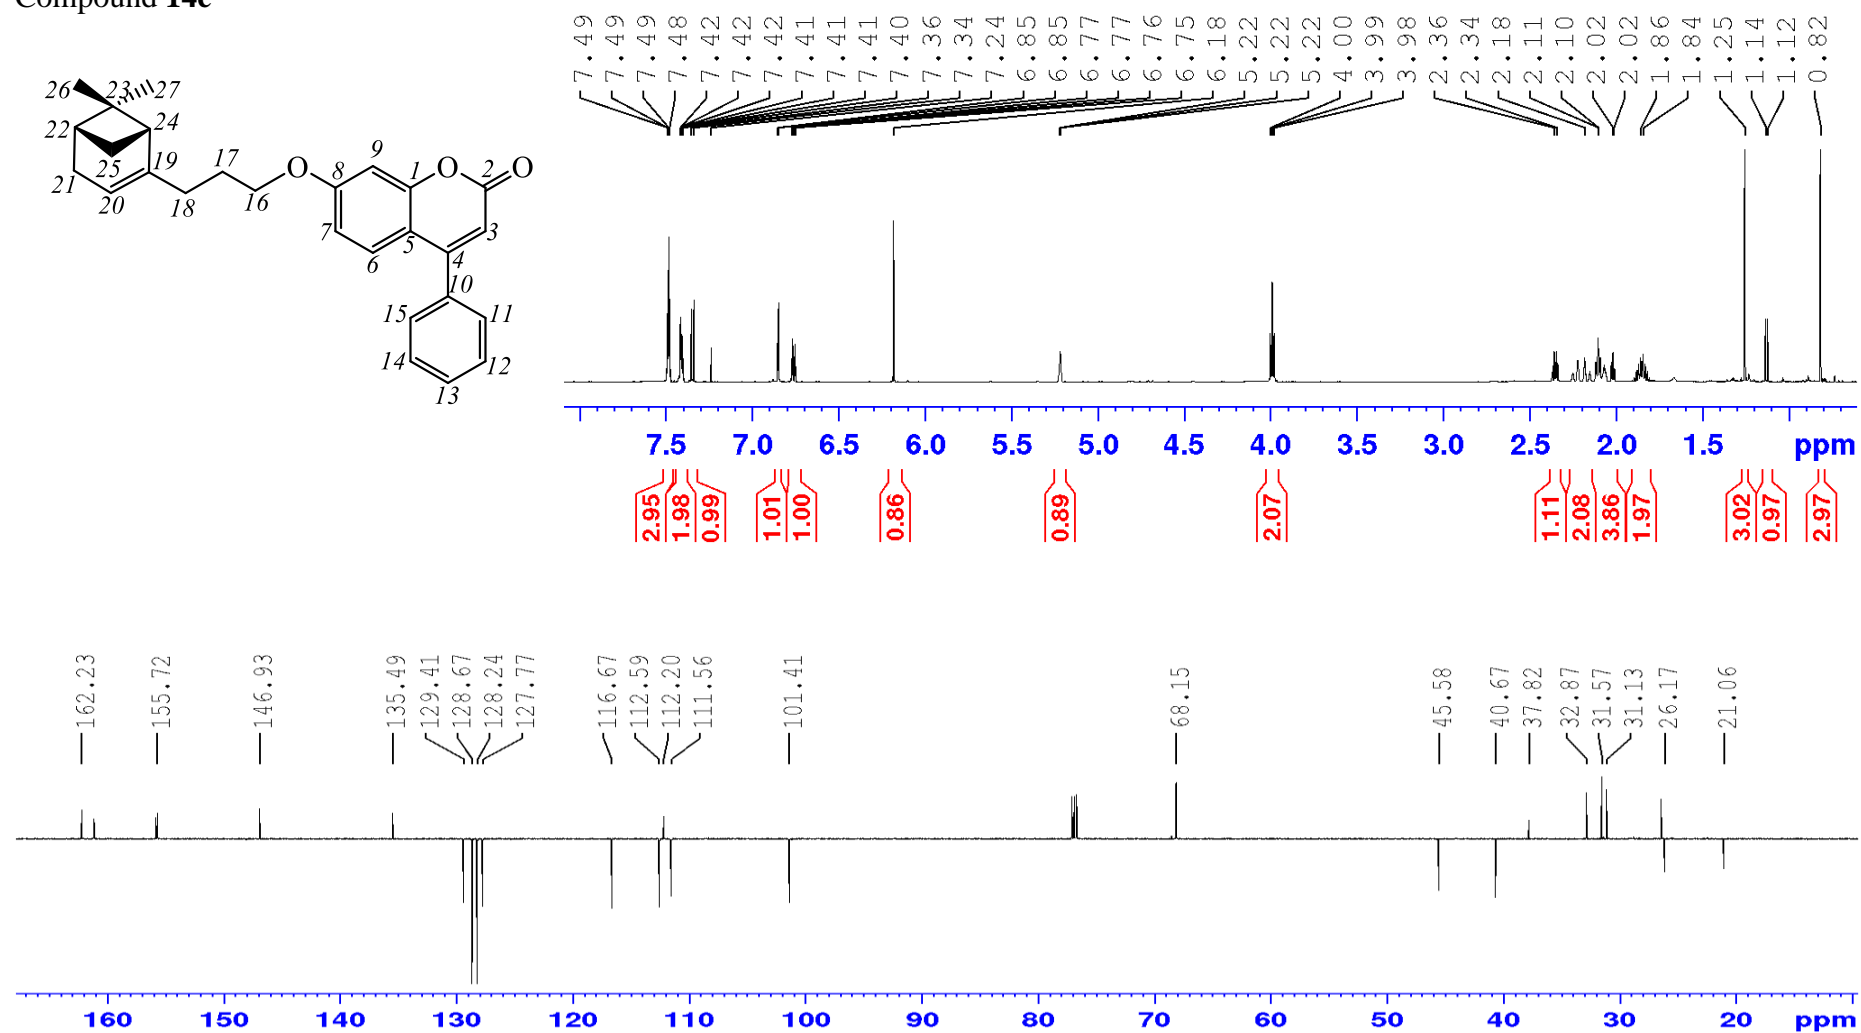

Compound **14f**

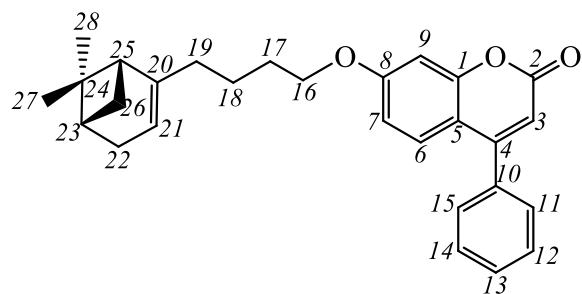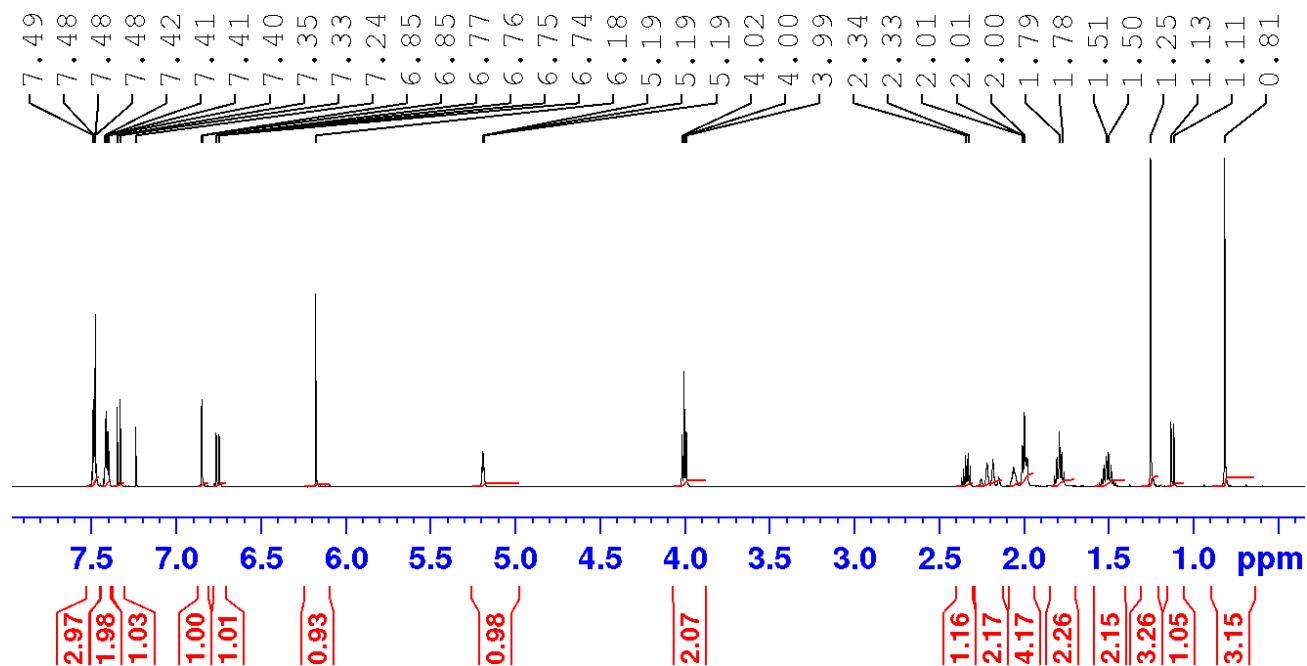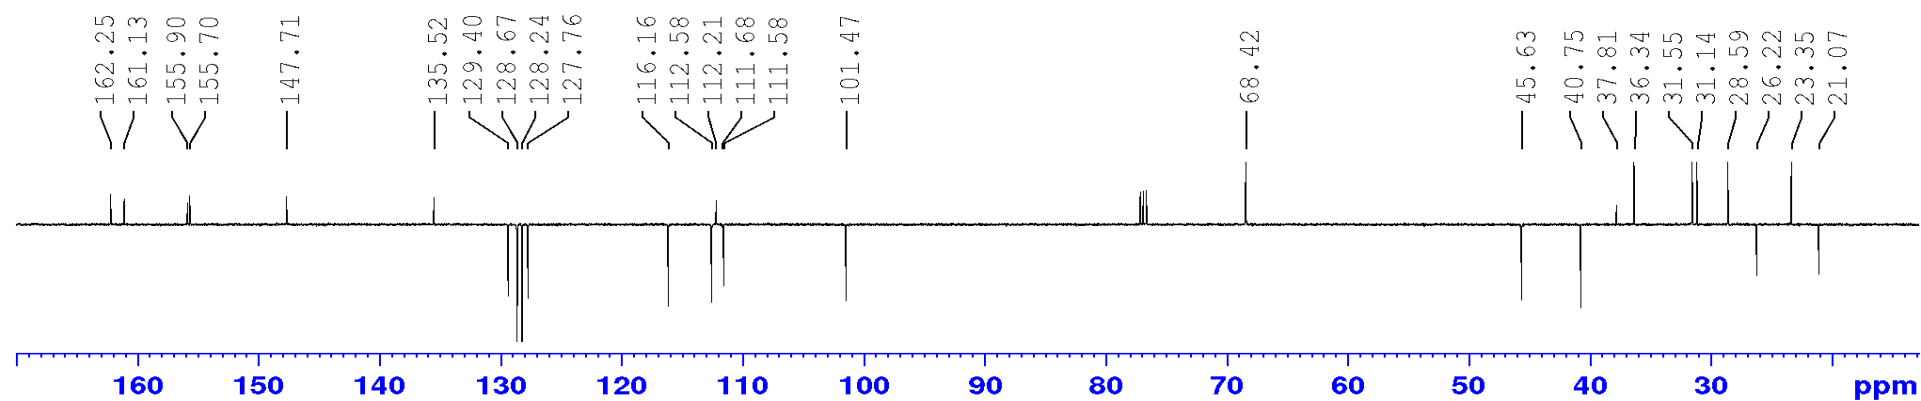

Compound **14g**

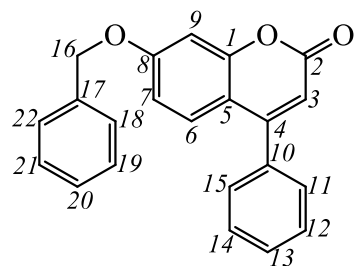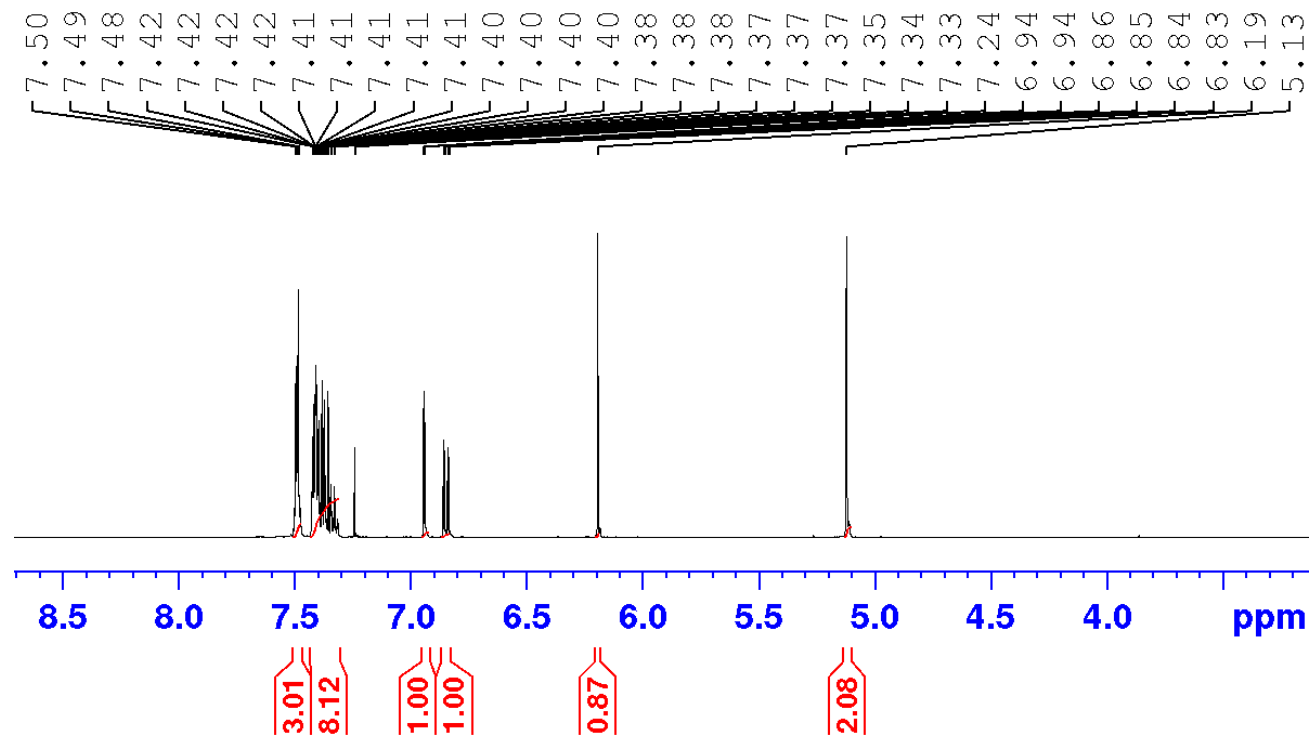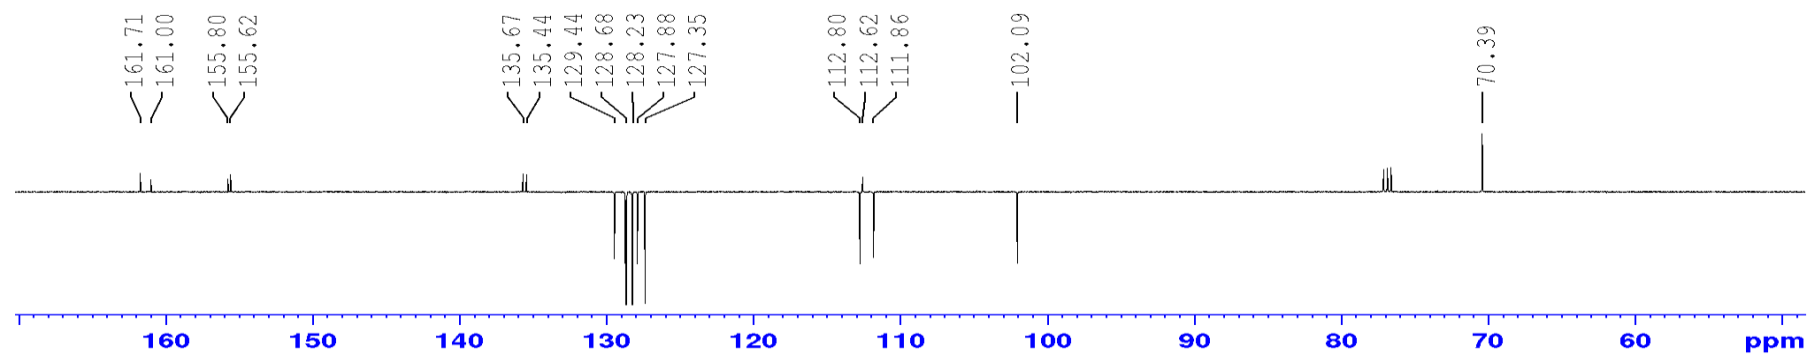

Compound **15a**

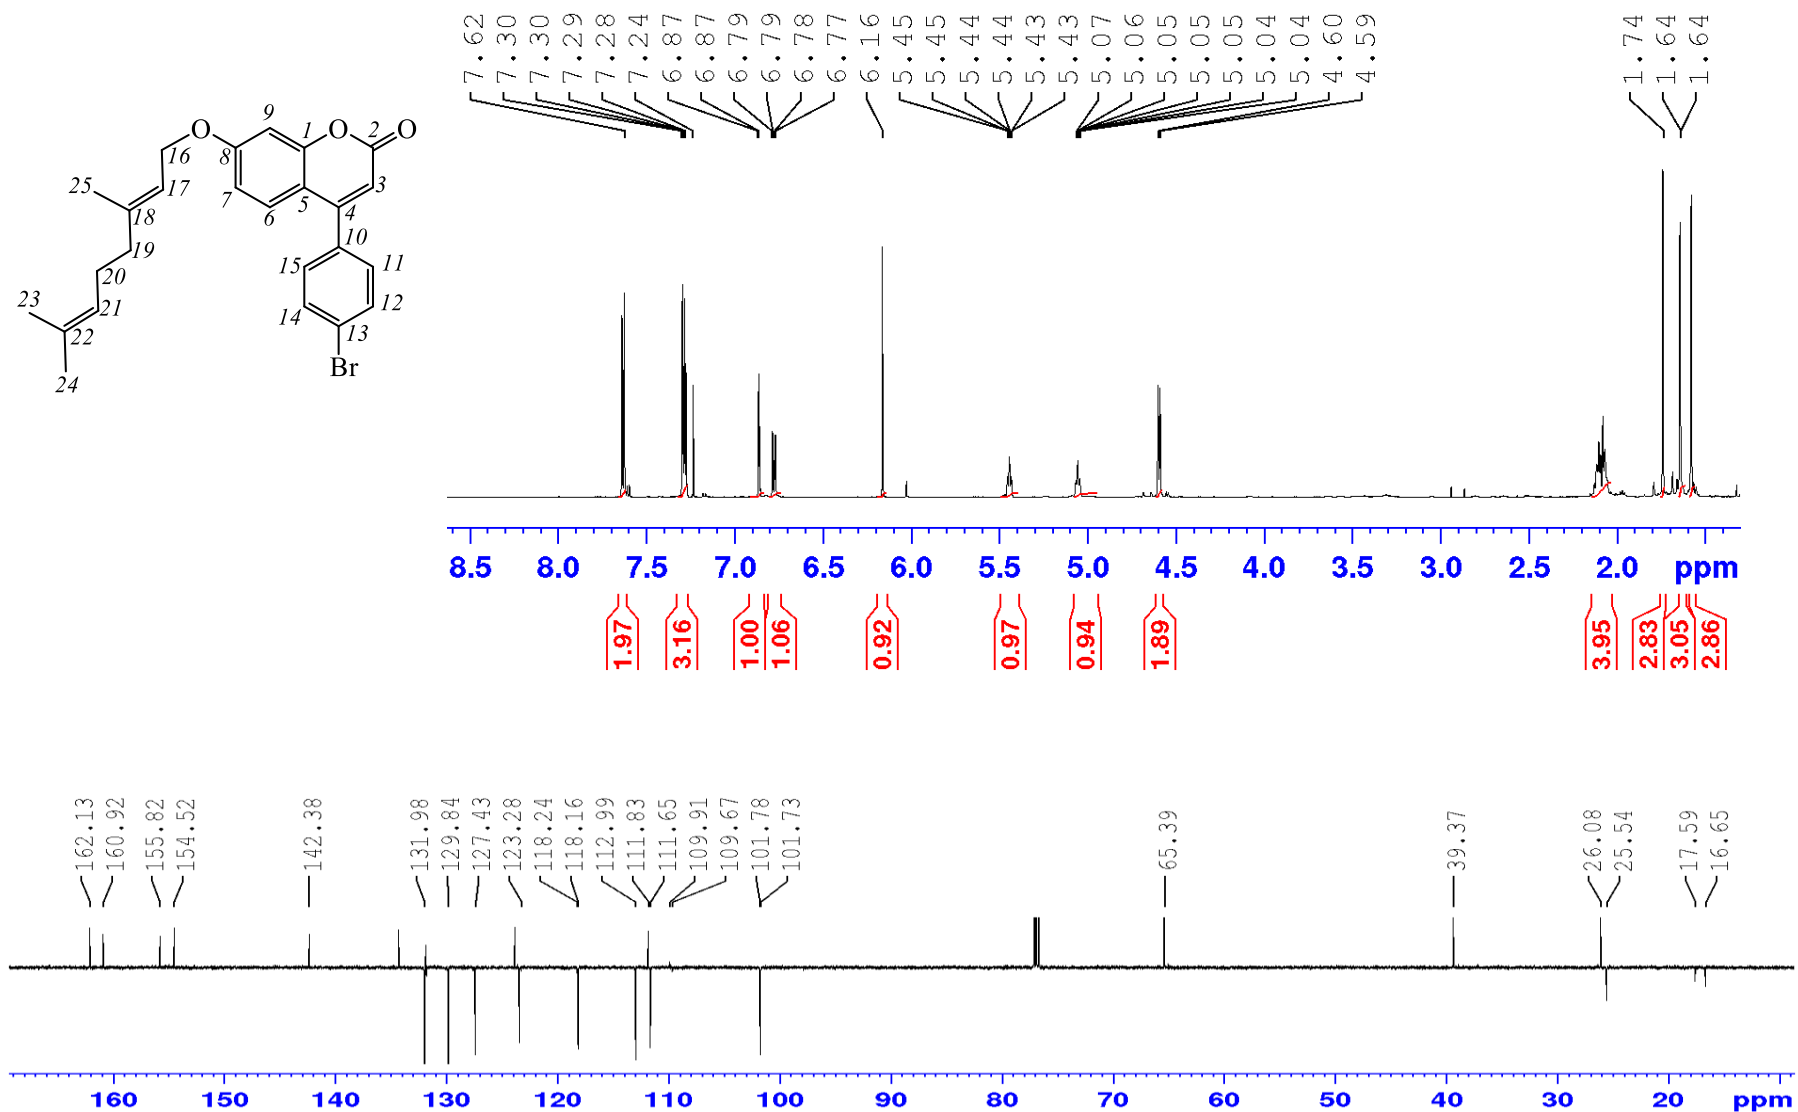



Compound **15b**

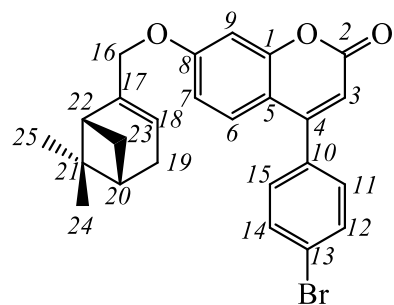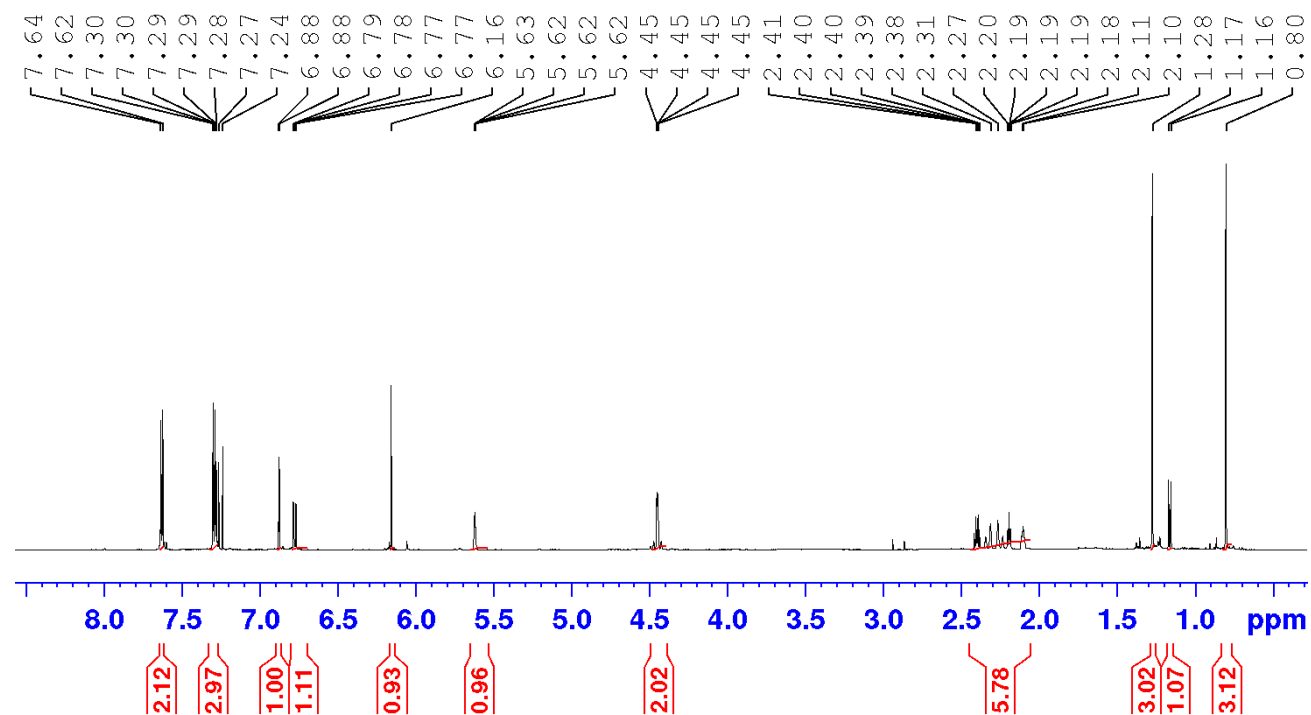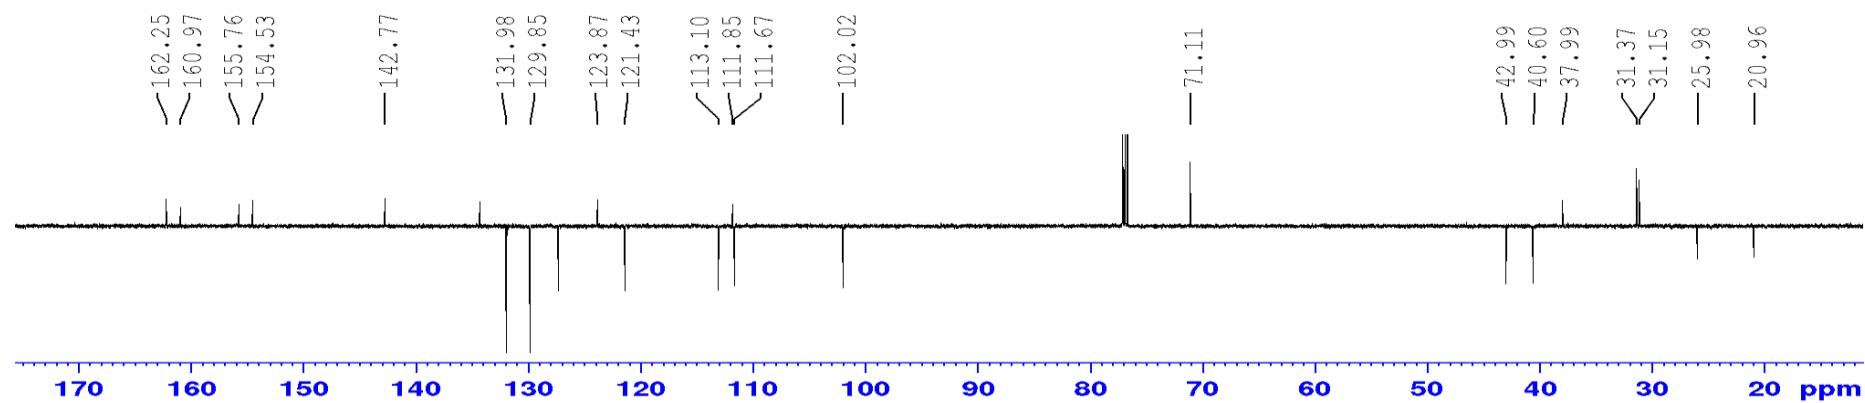

Compound **15d**

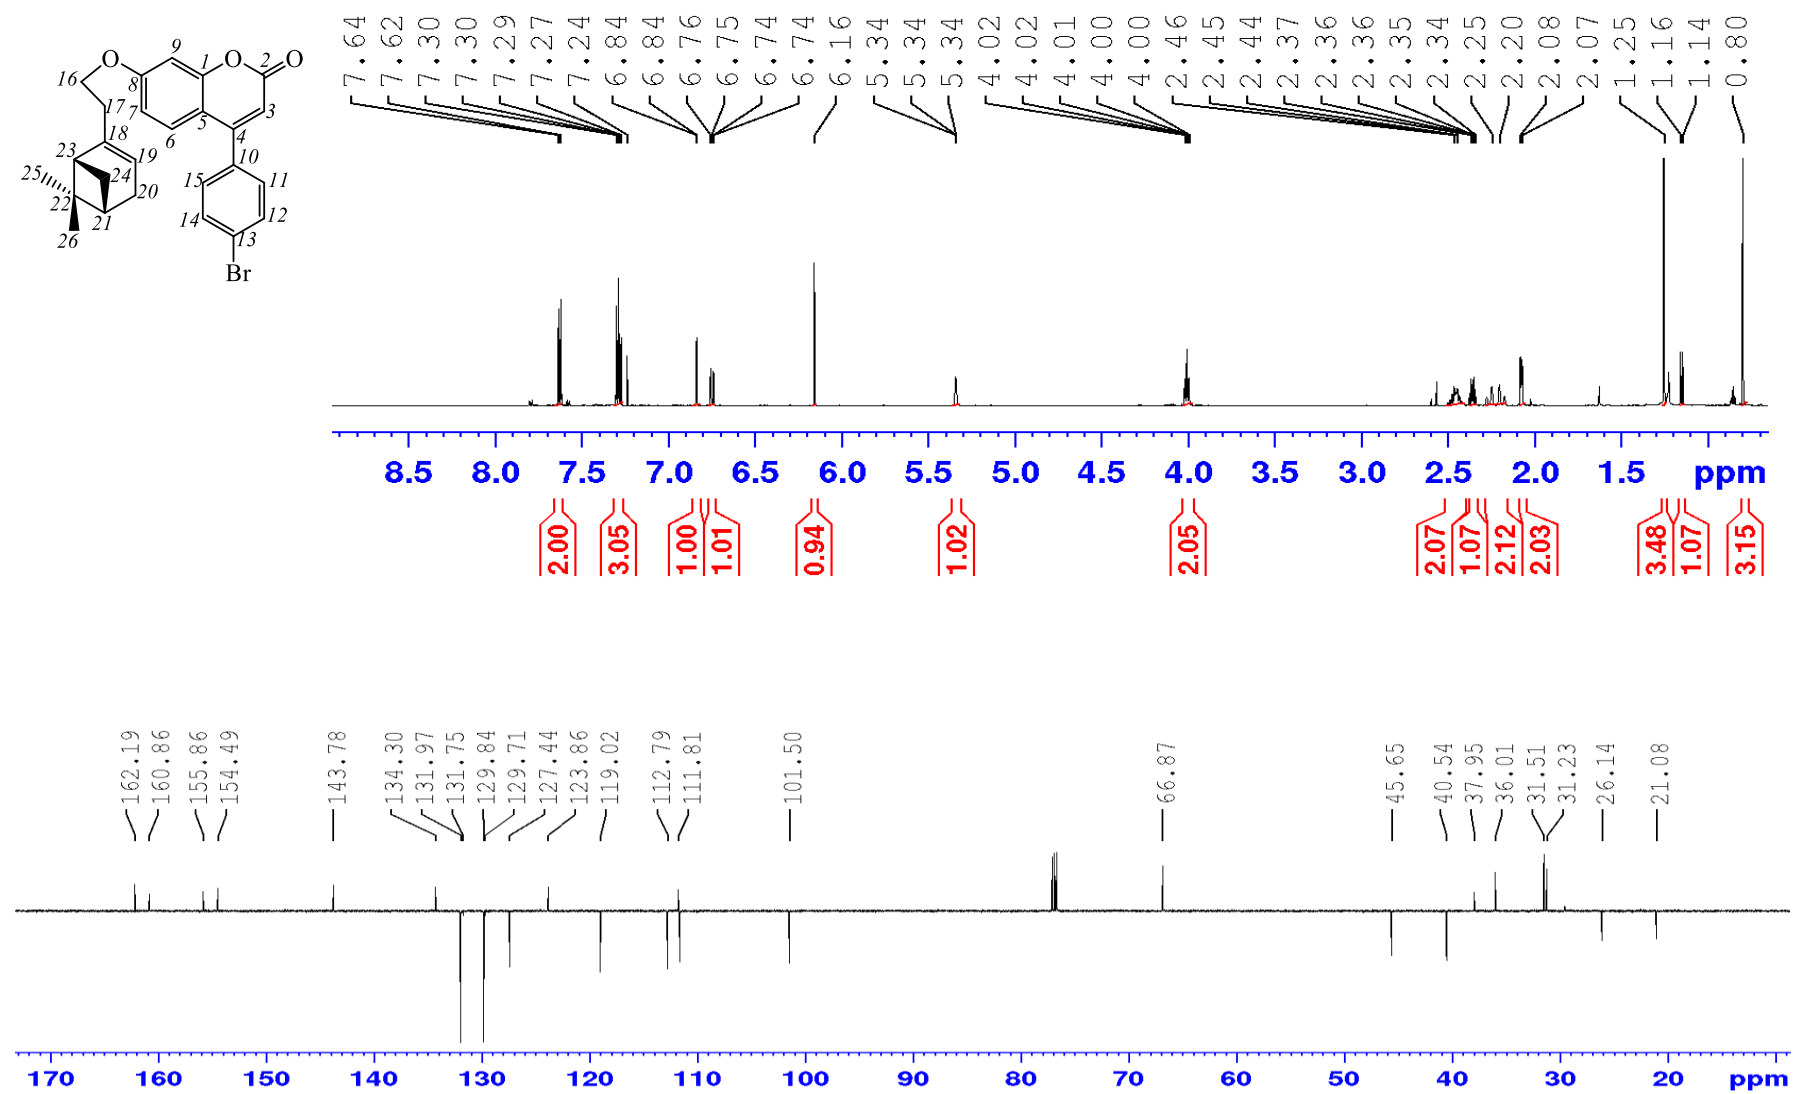

Compound **15e**

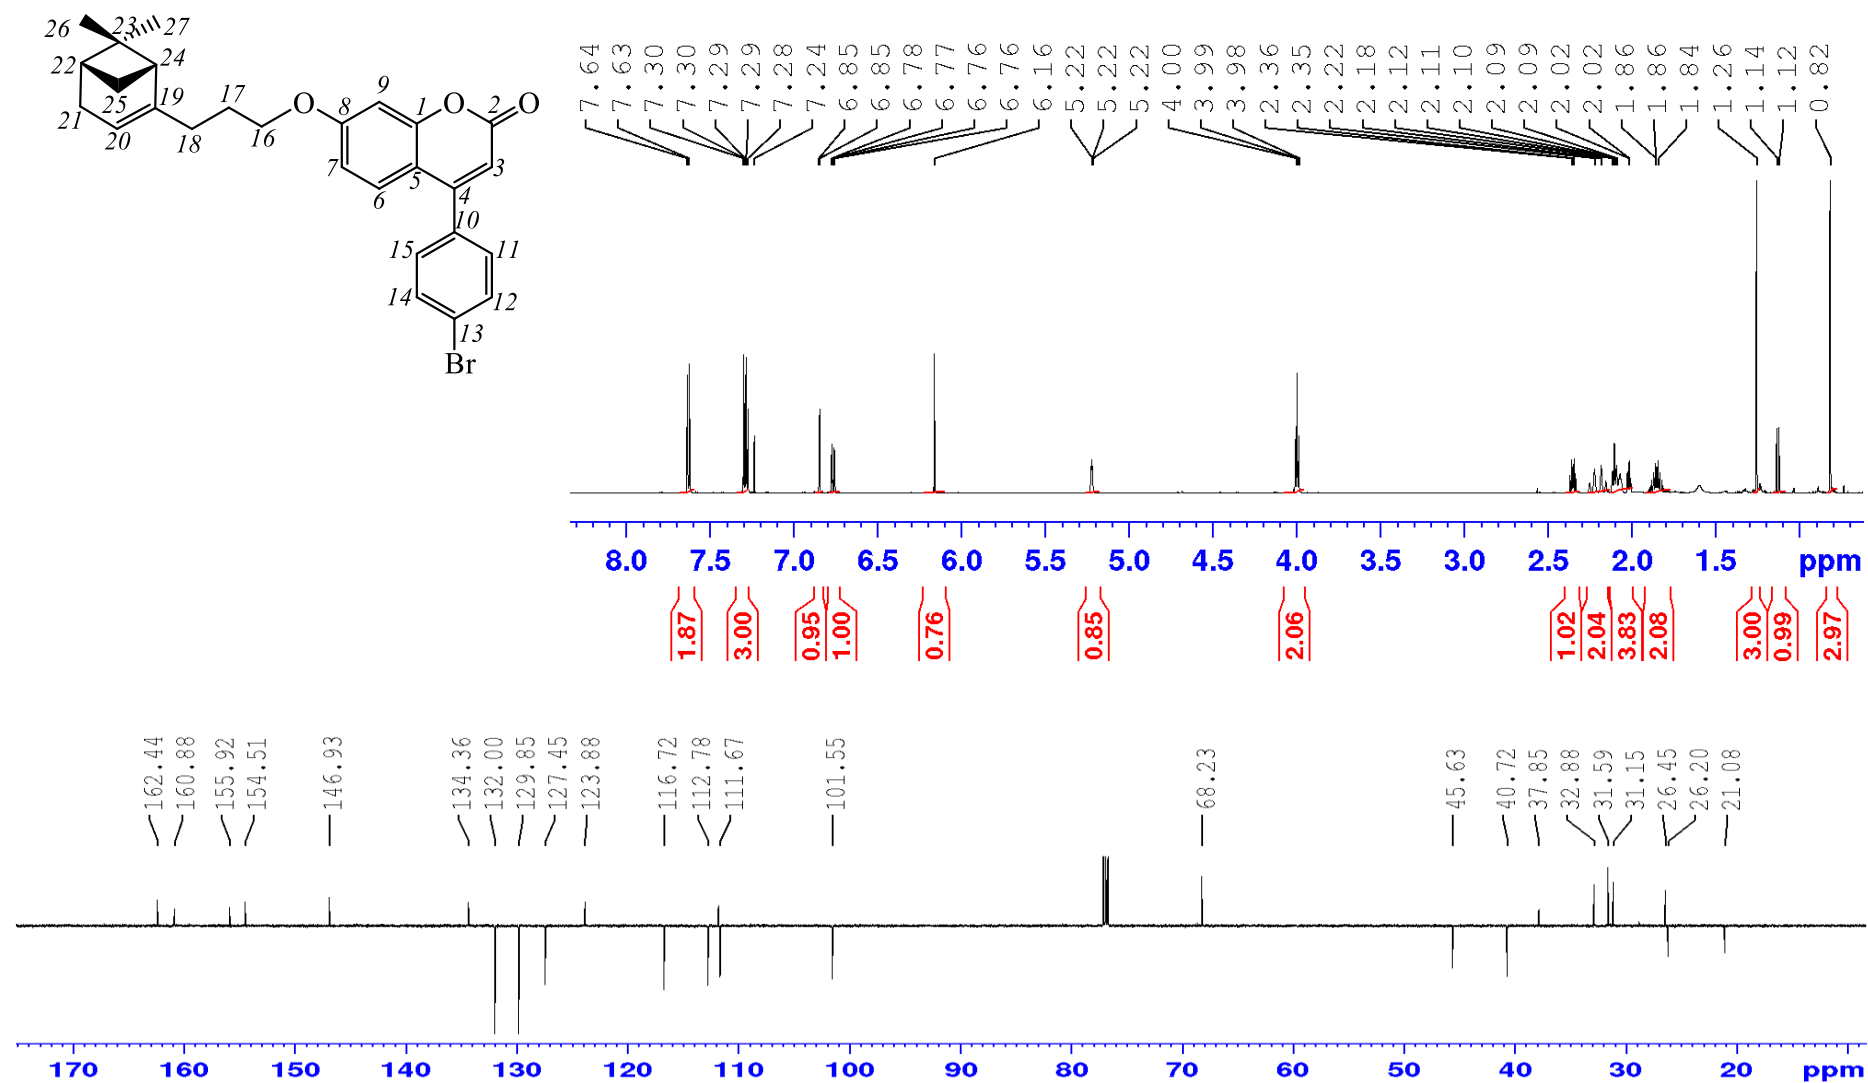

Compound **15f**

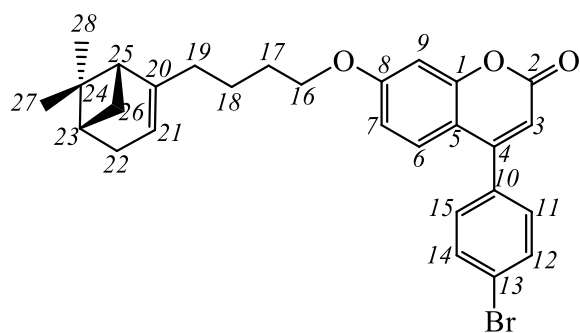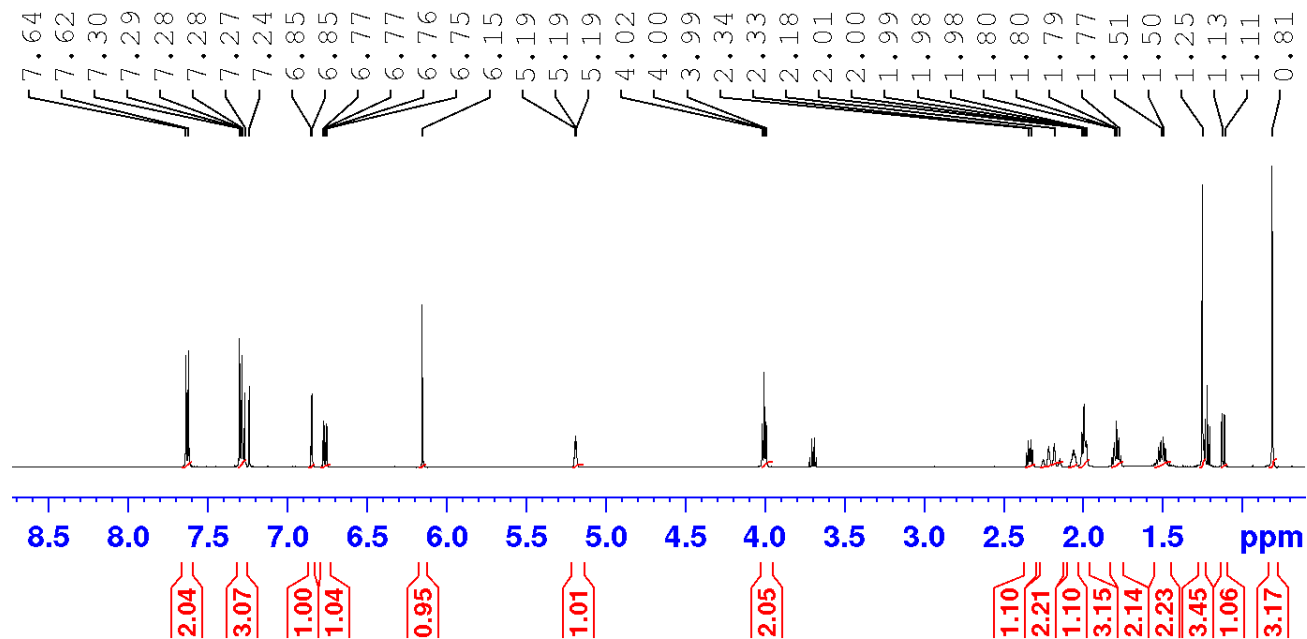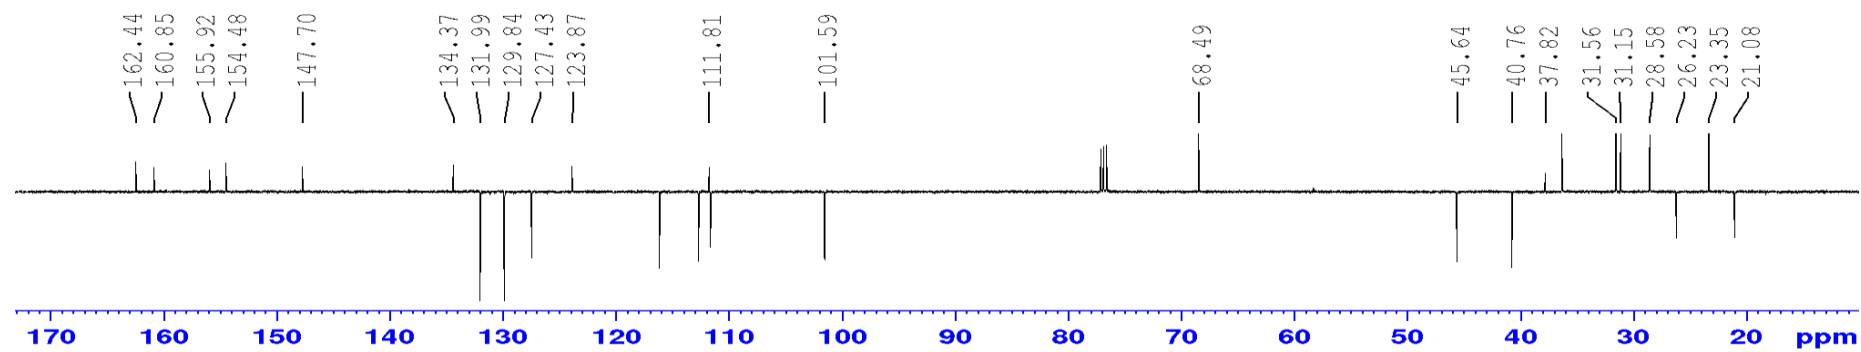

Compound **15g**

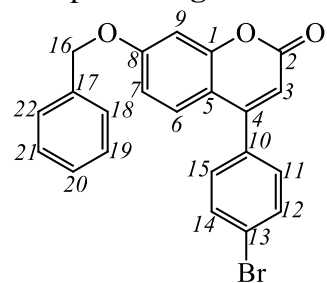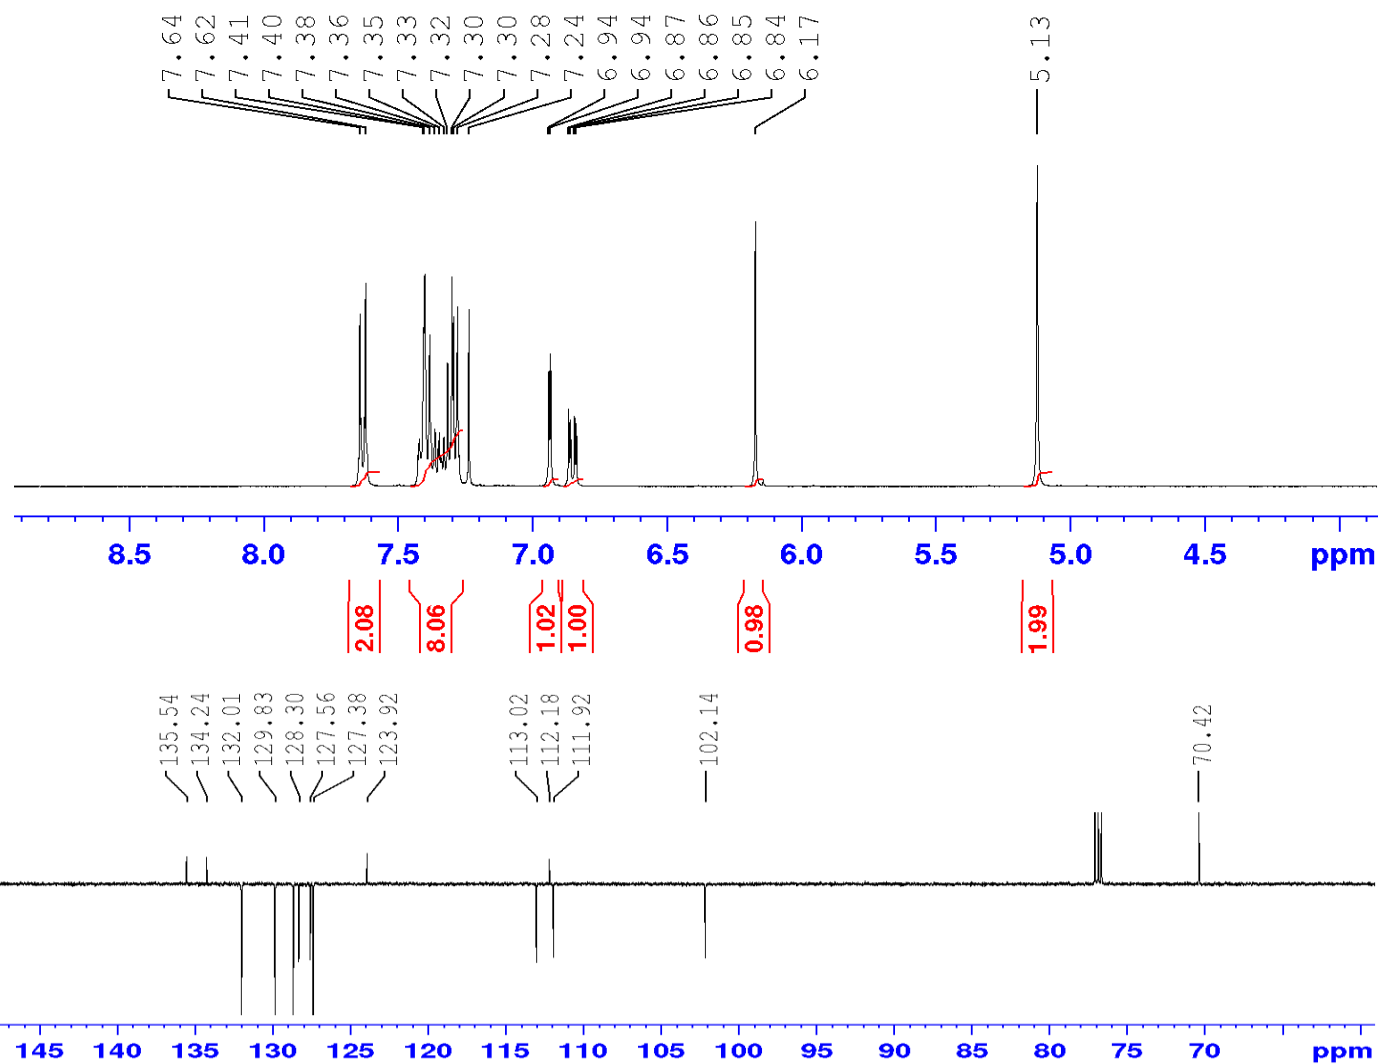

Compound **16a**

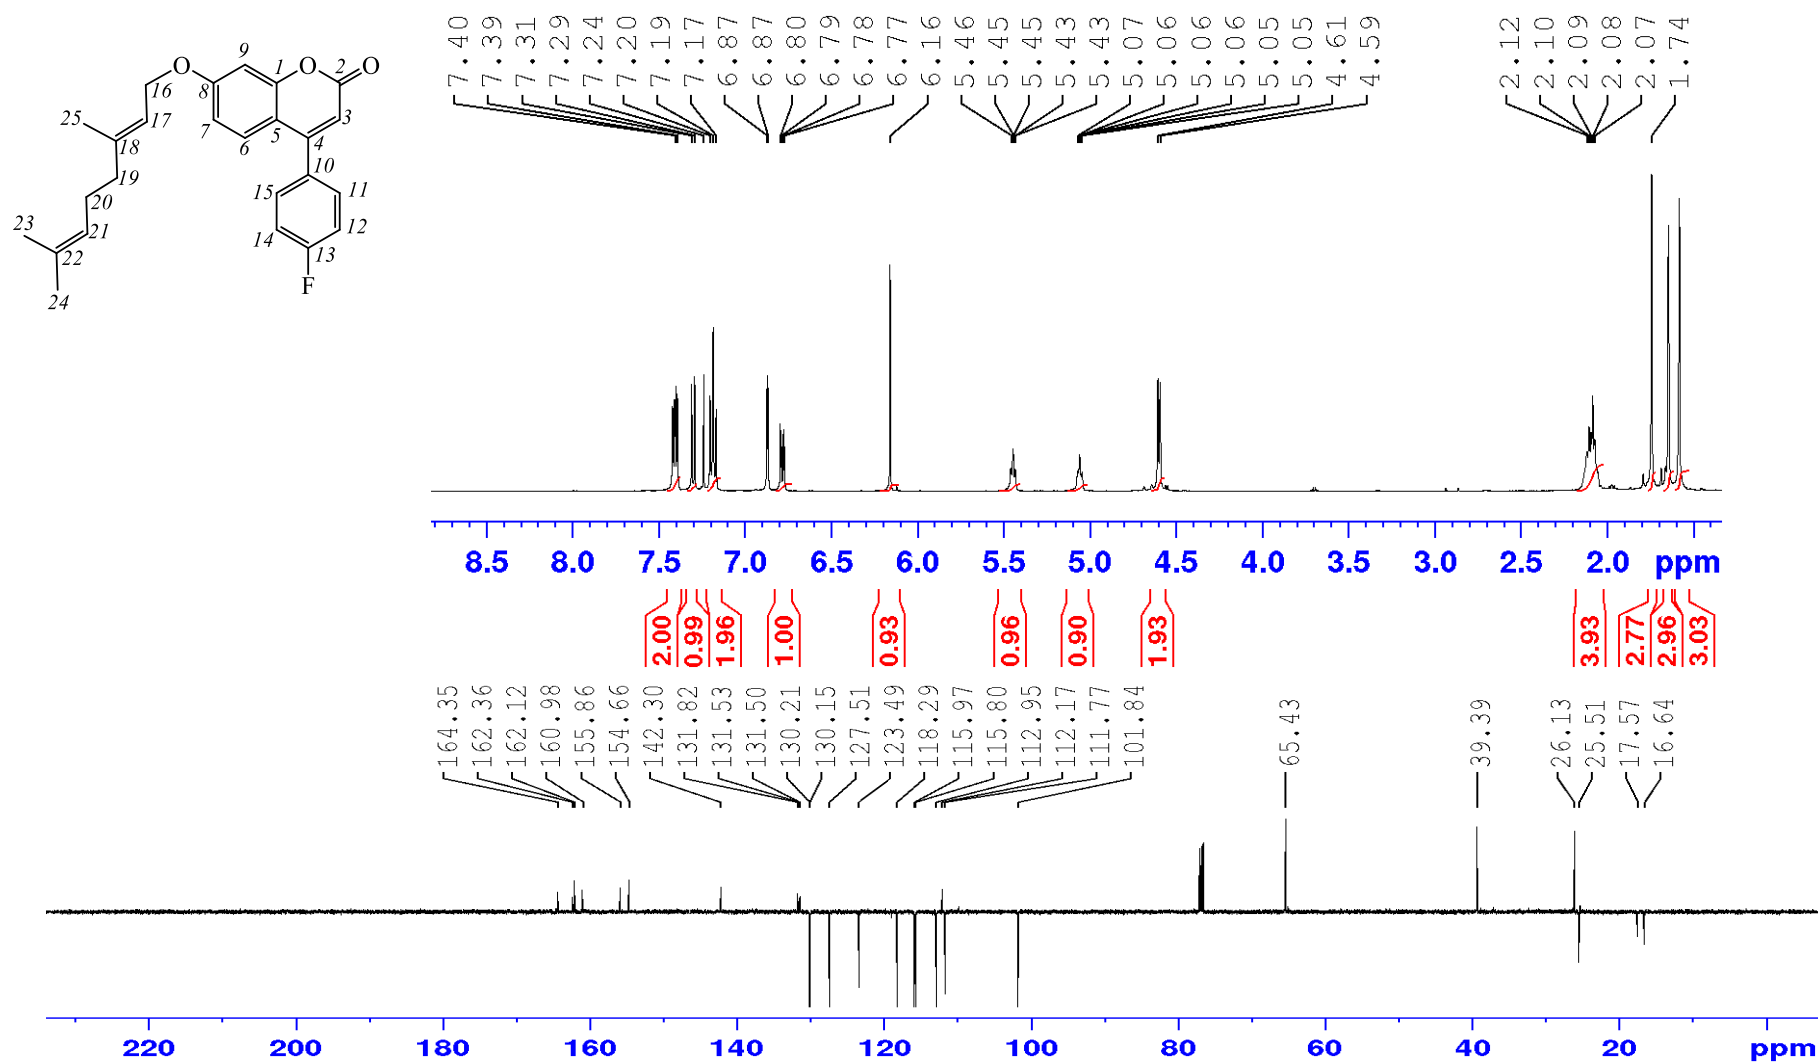

Compound **16b**

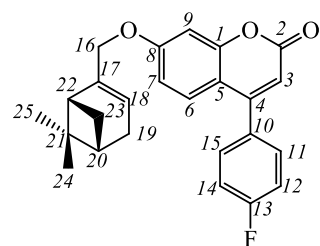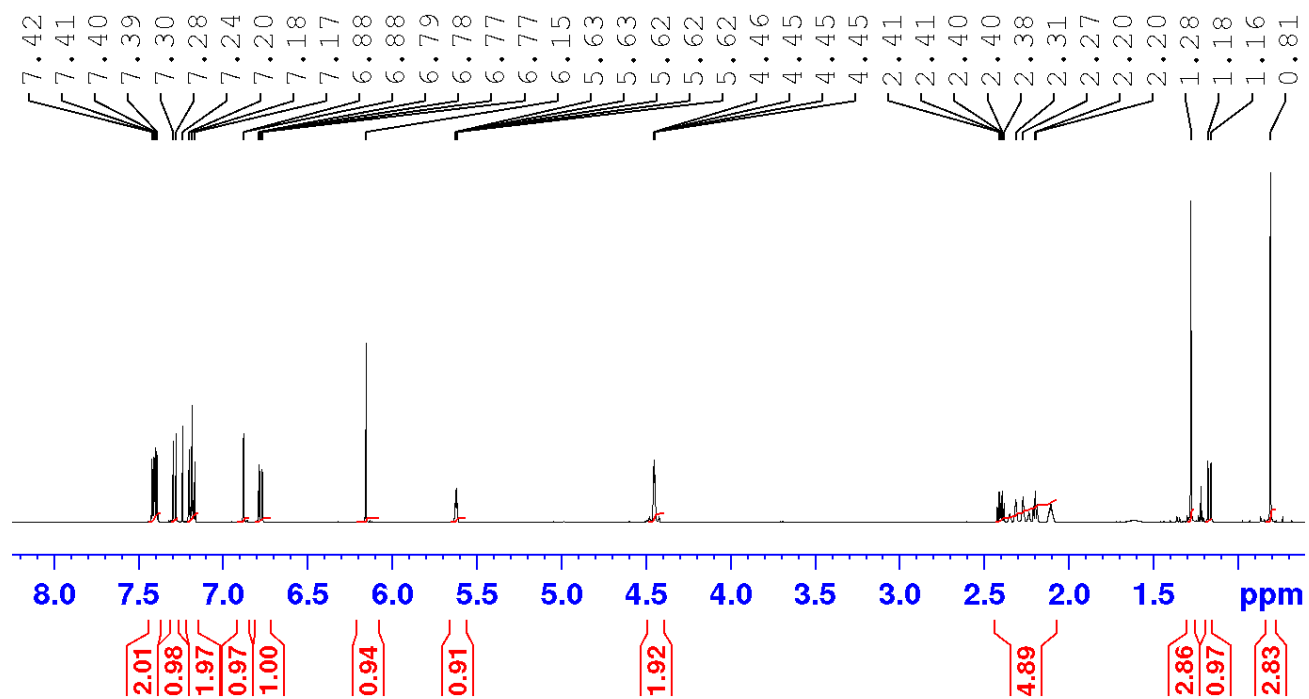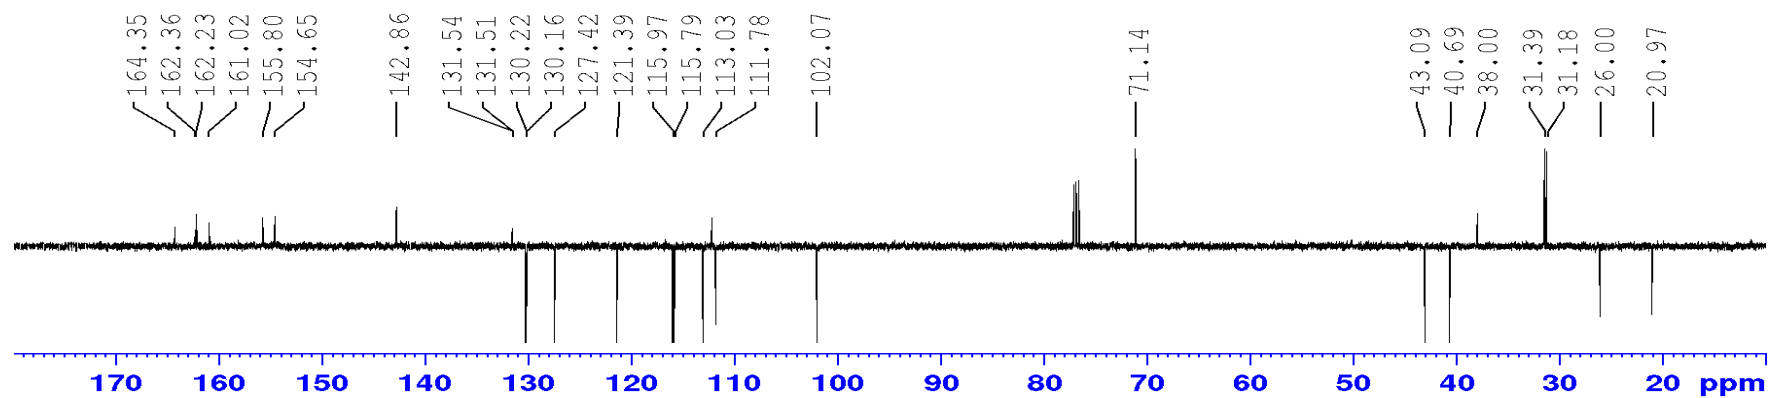

Compound **16e**

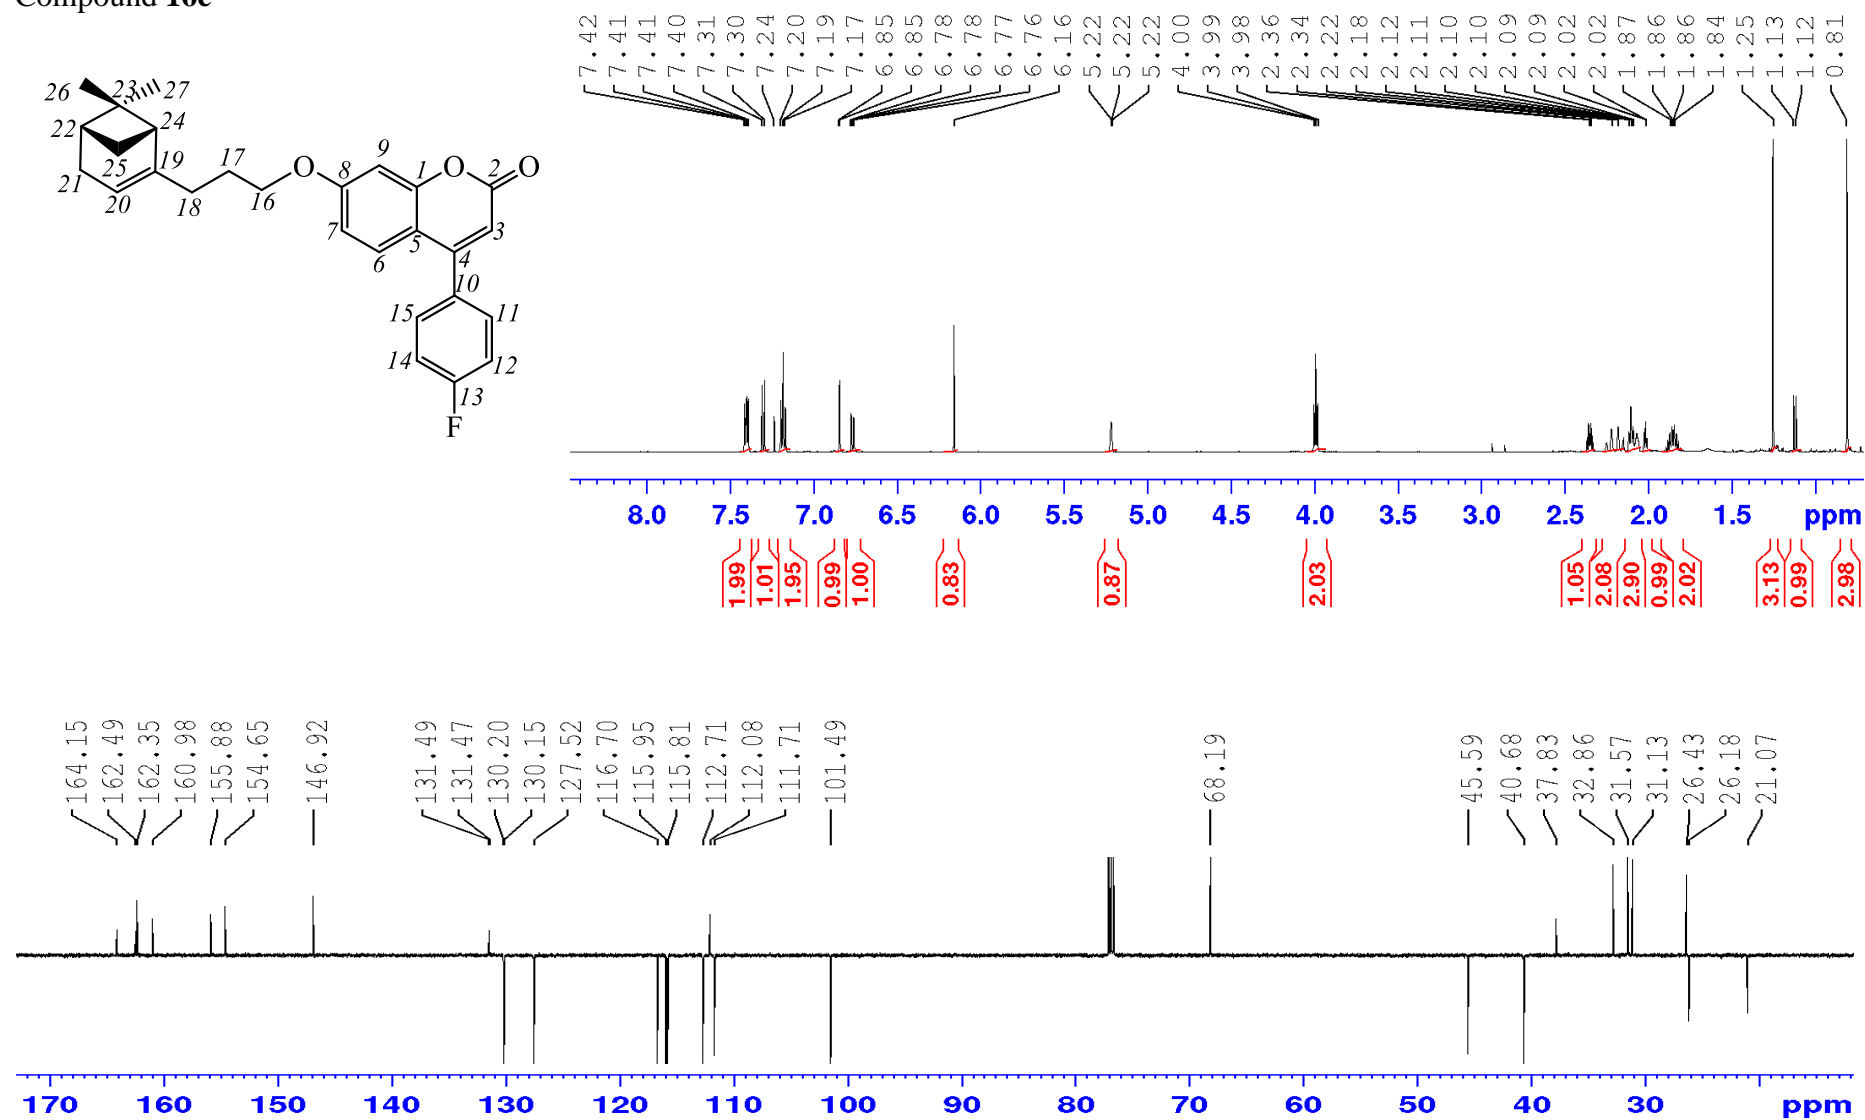



Compound **16f**

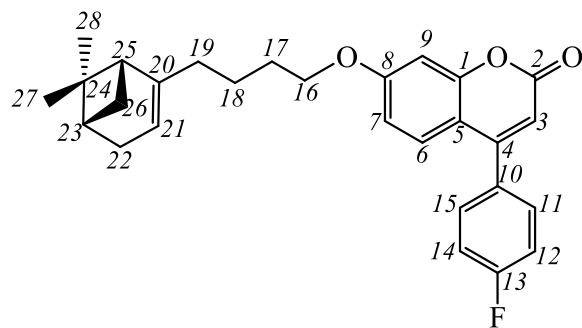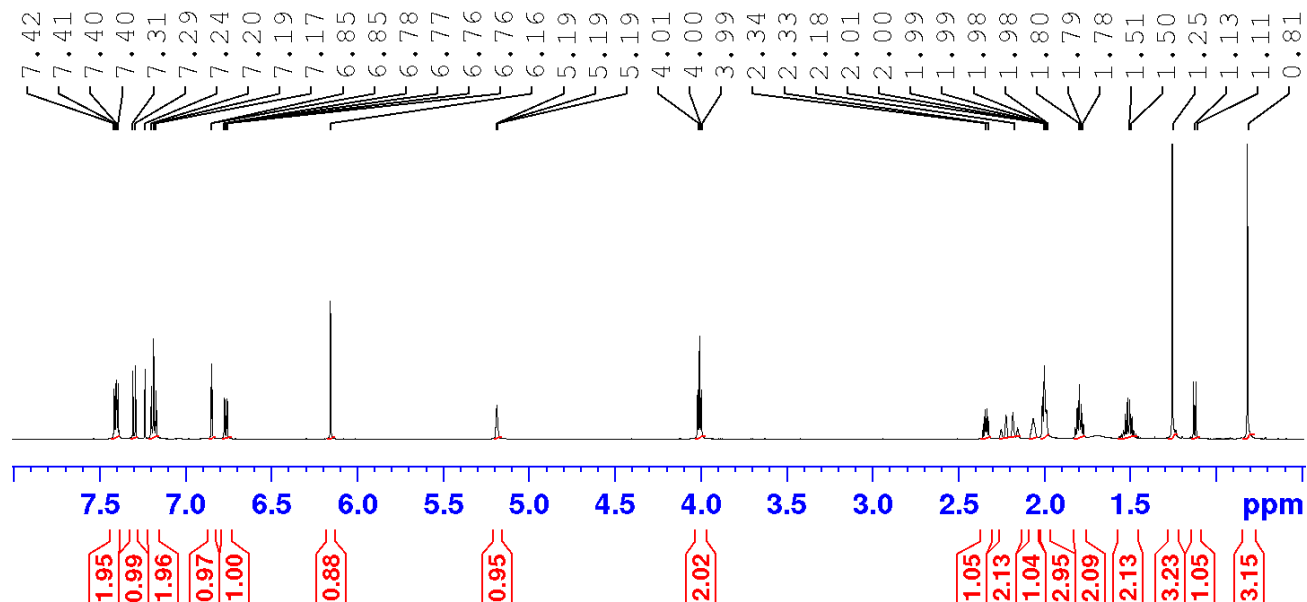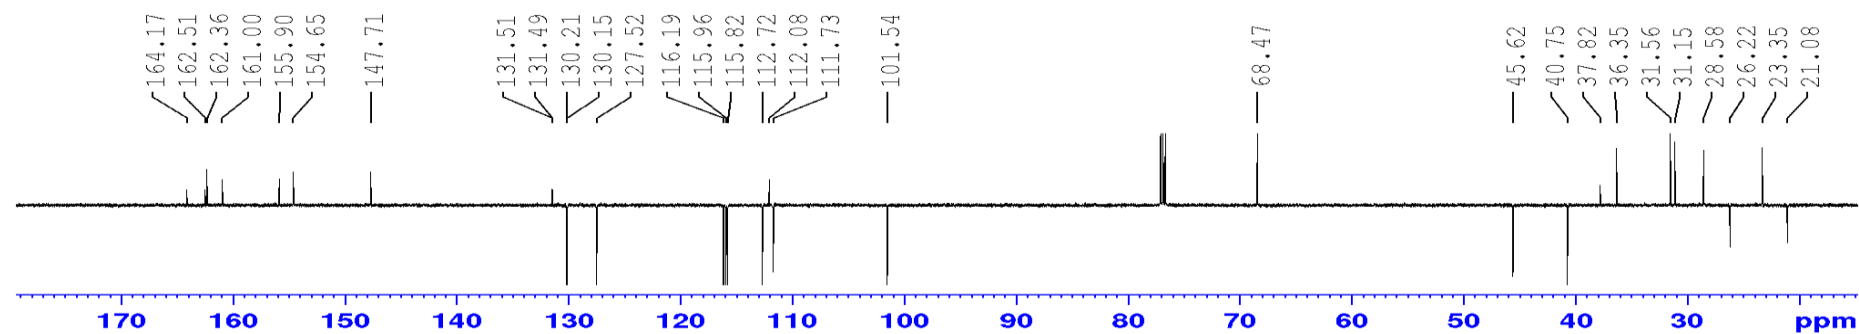

Compound **16g**

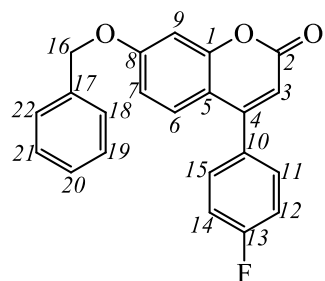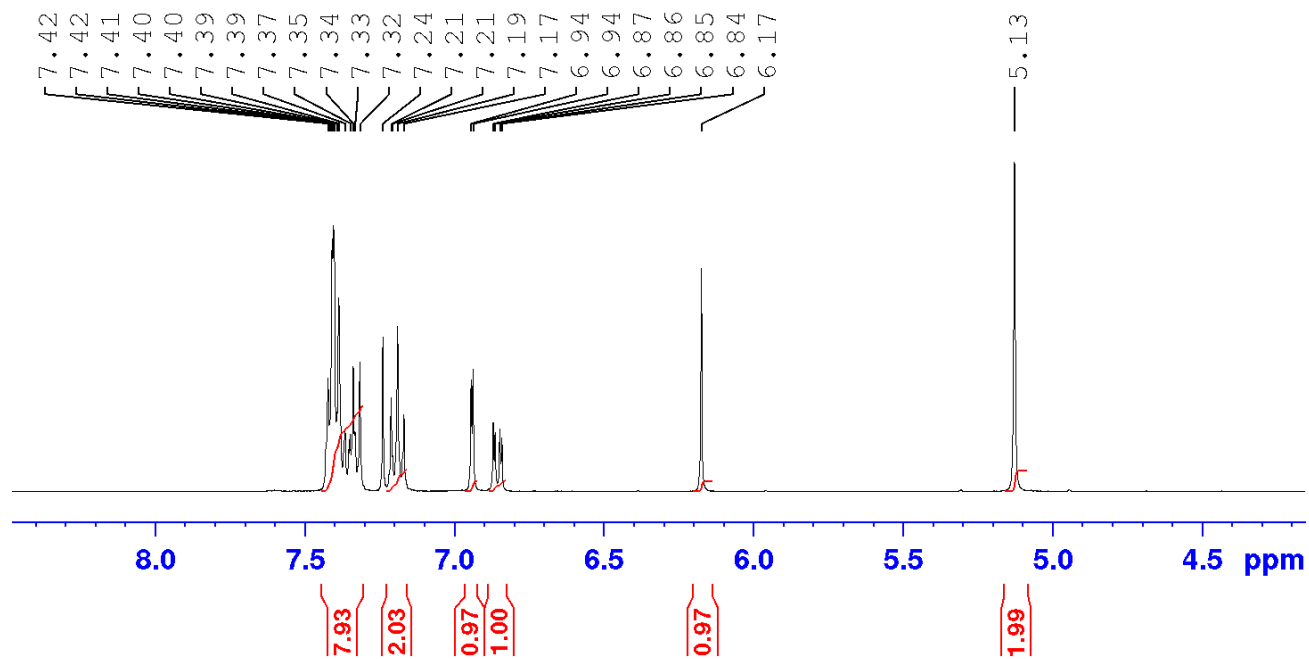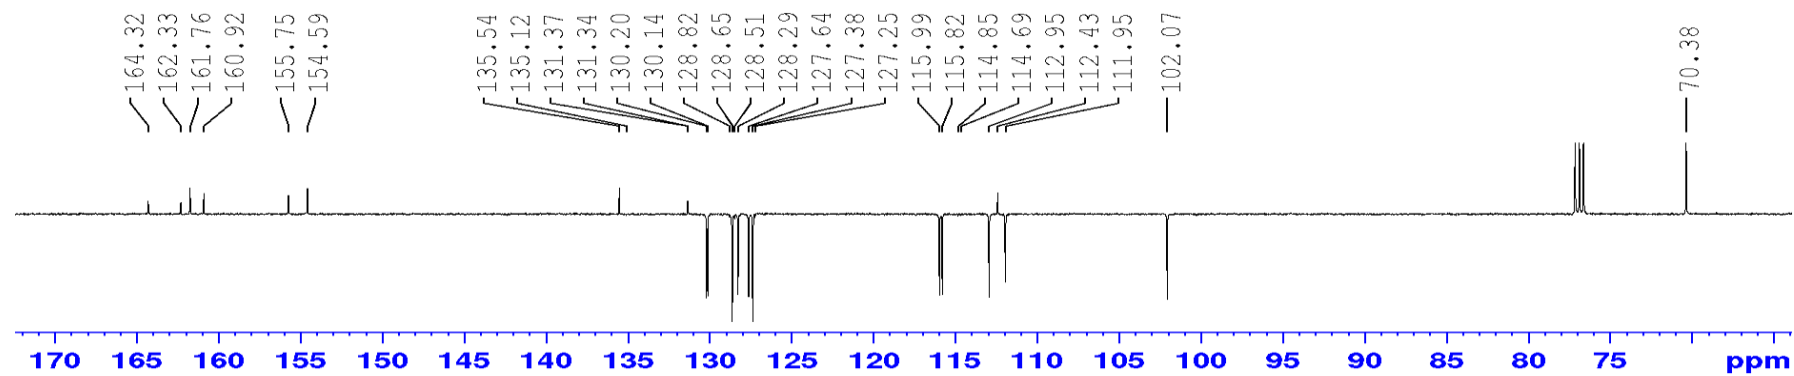

Compound 17a

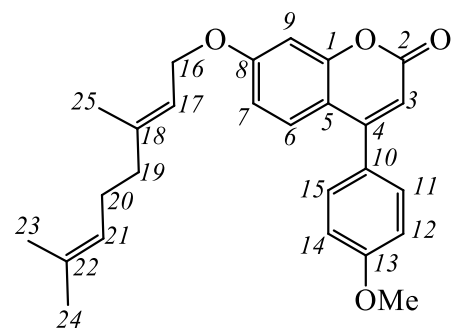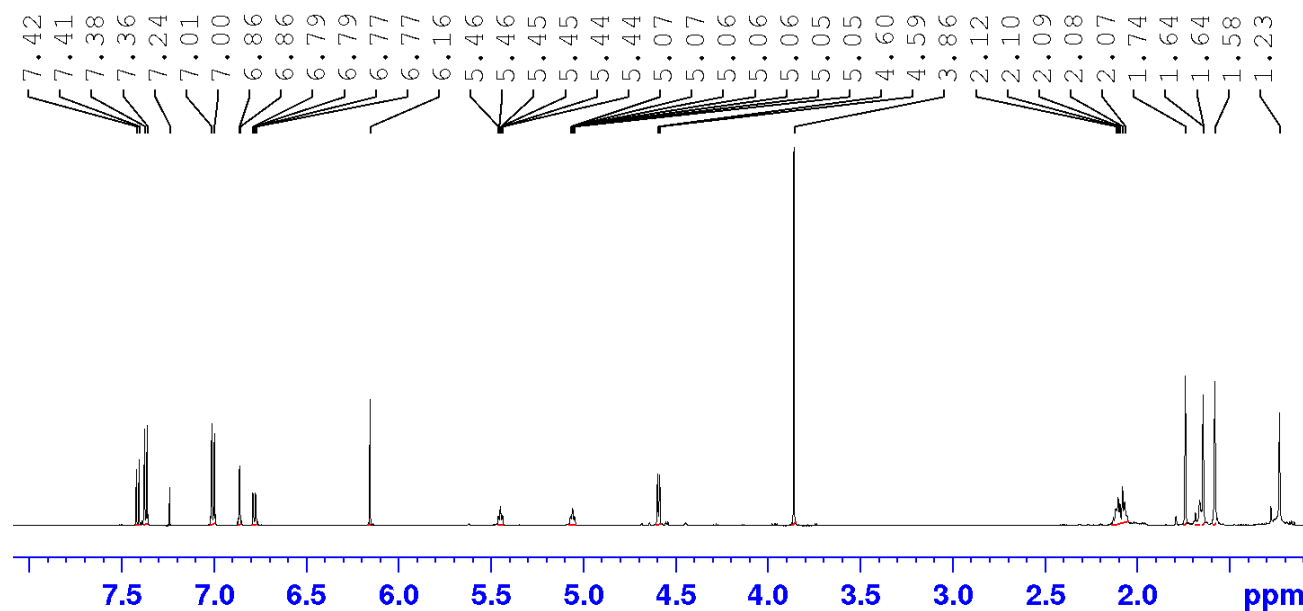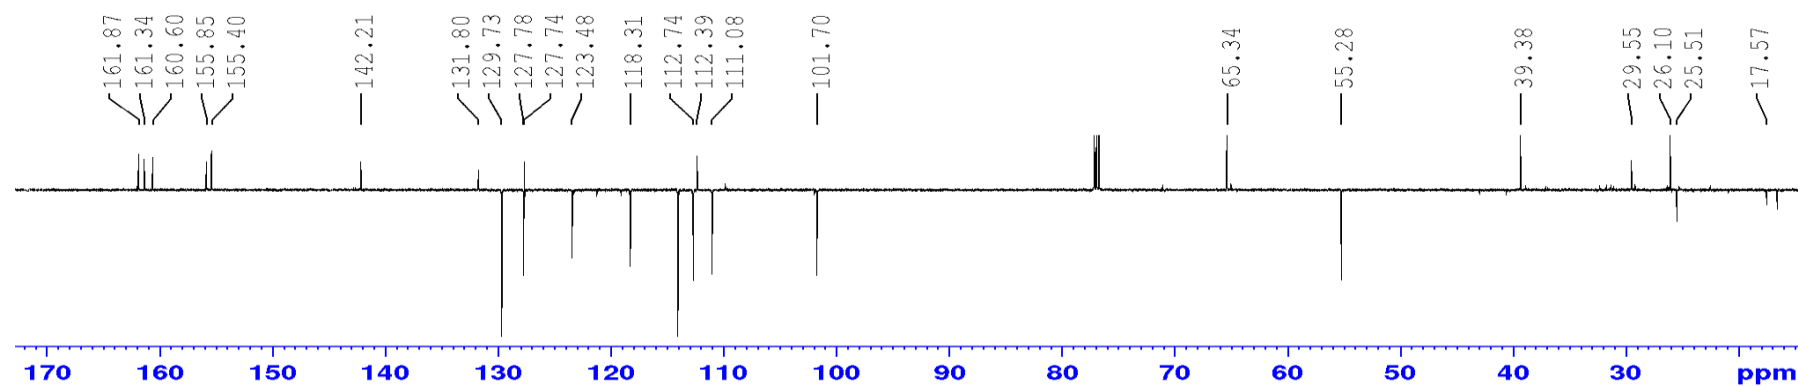

Compound **17b**

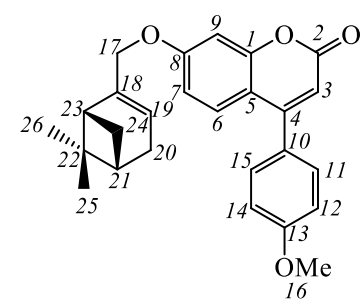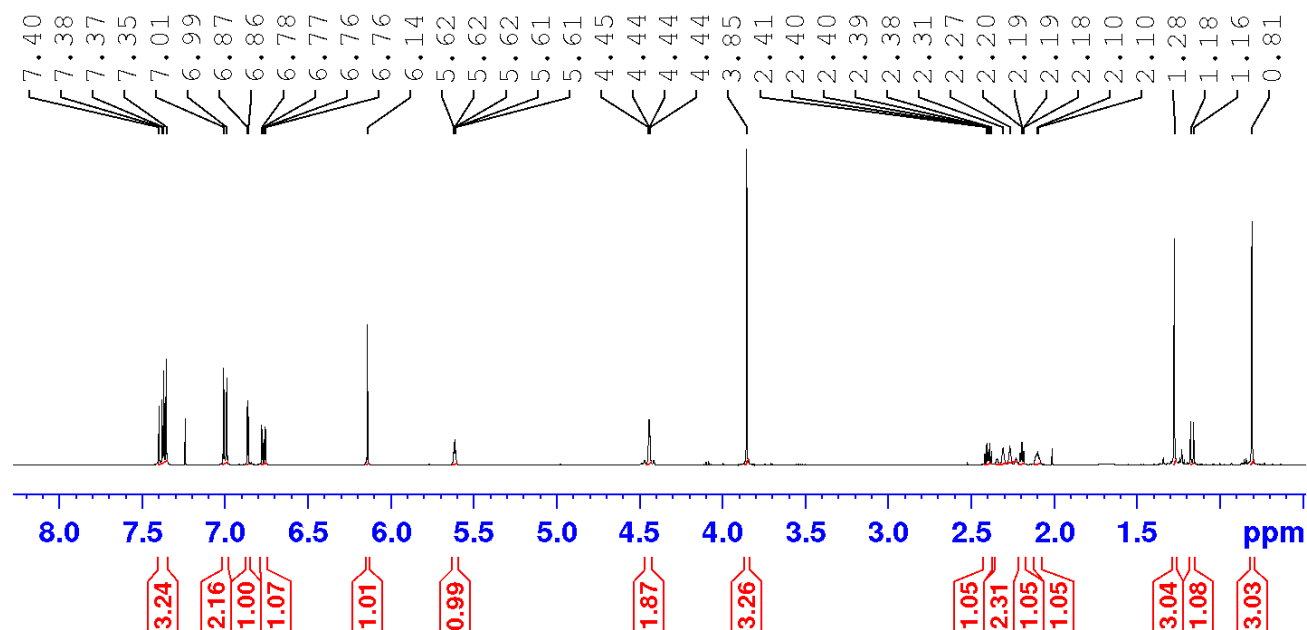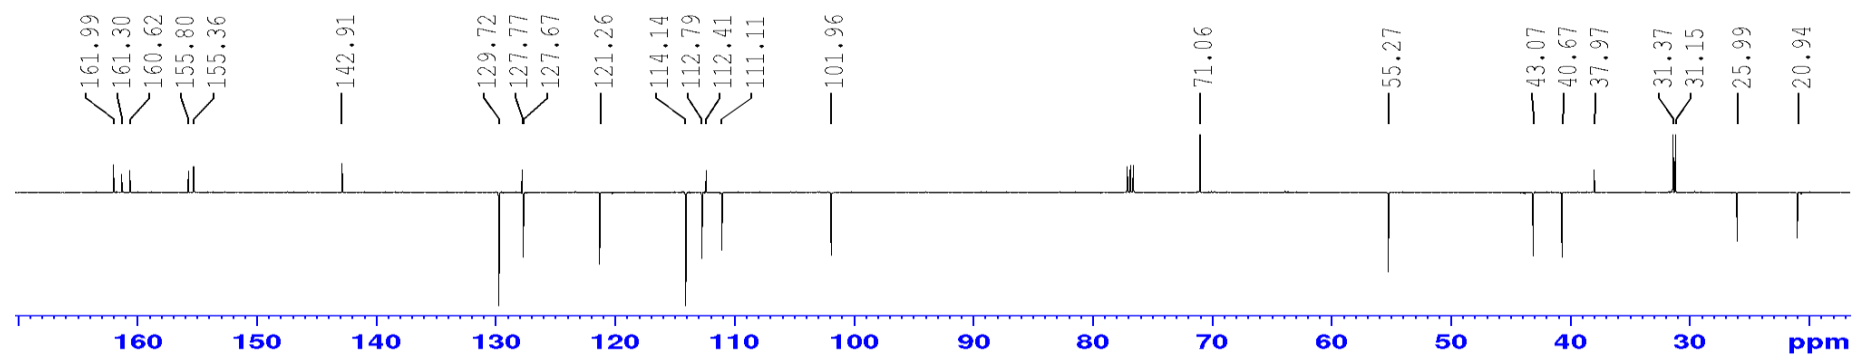

Compound **17d**

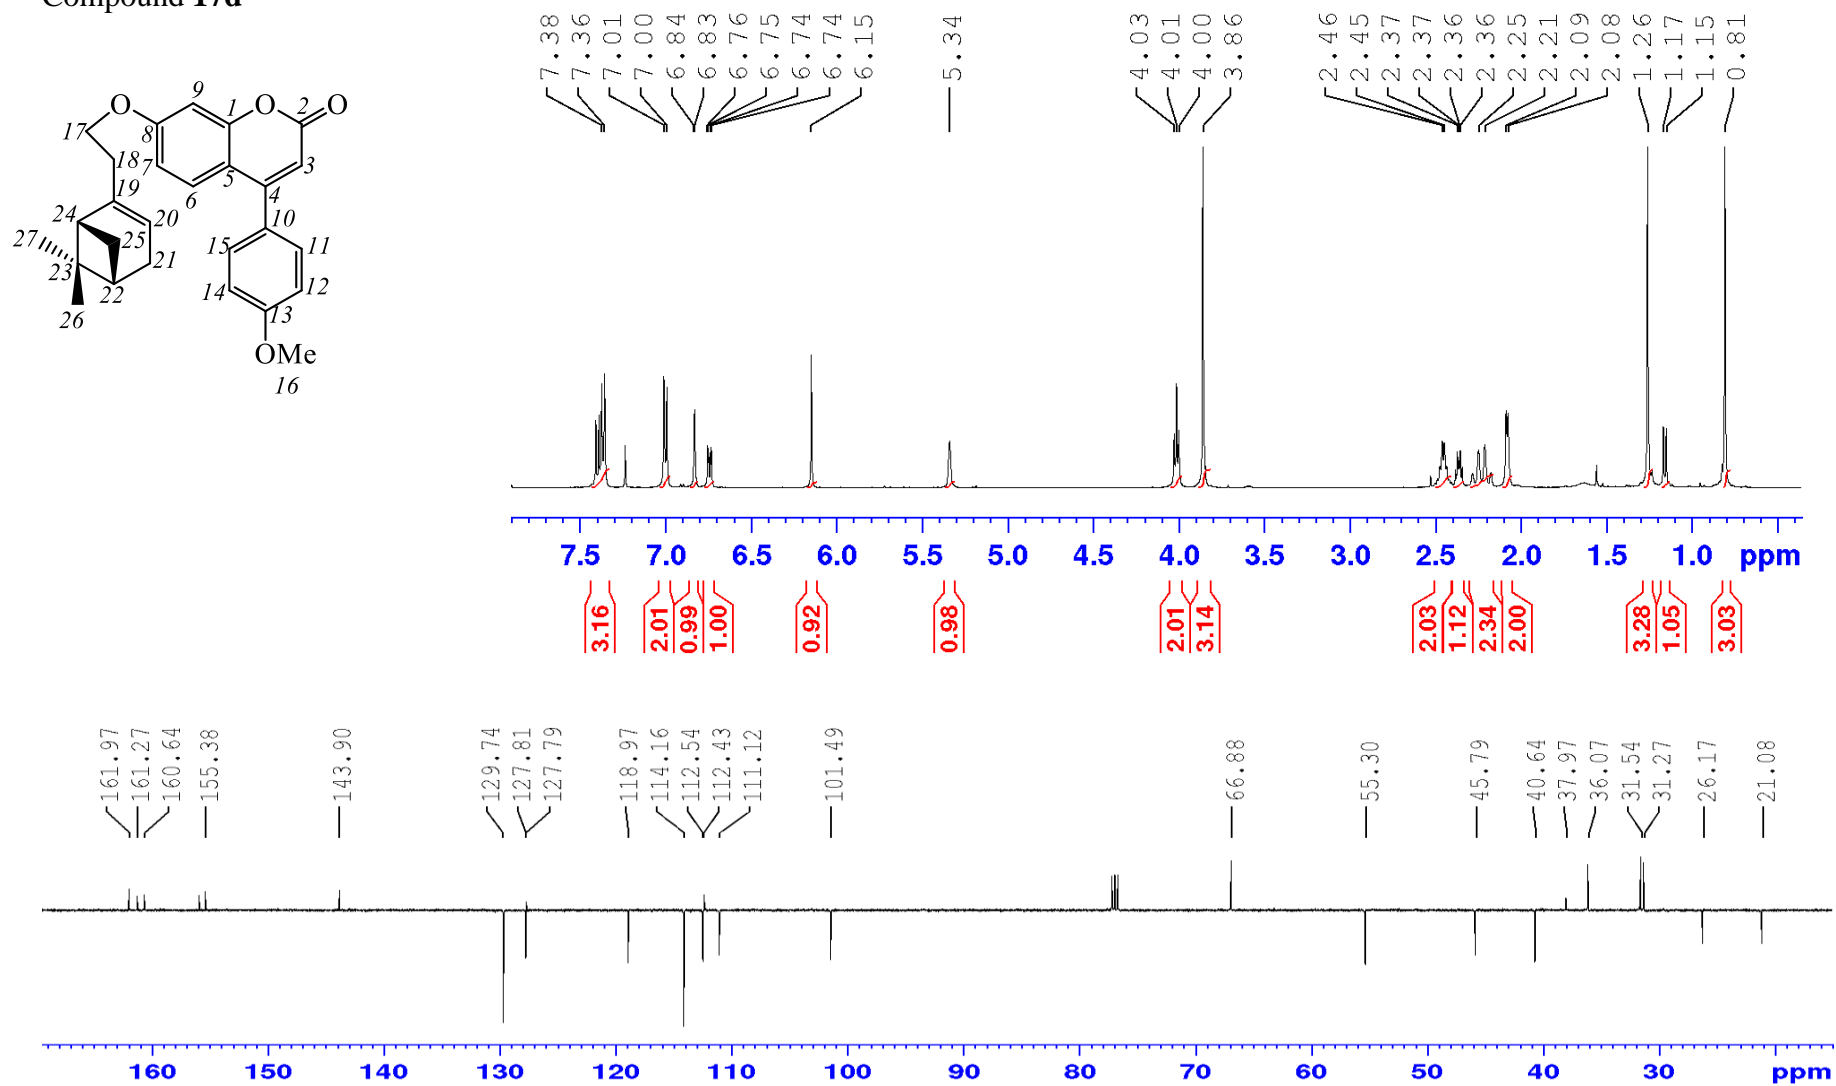

Compound 17e

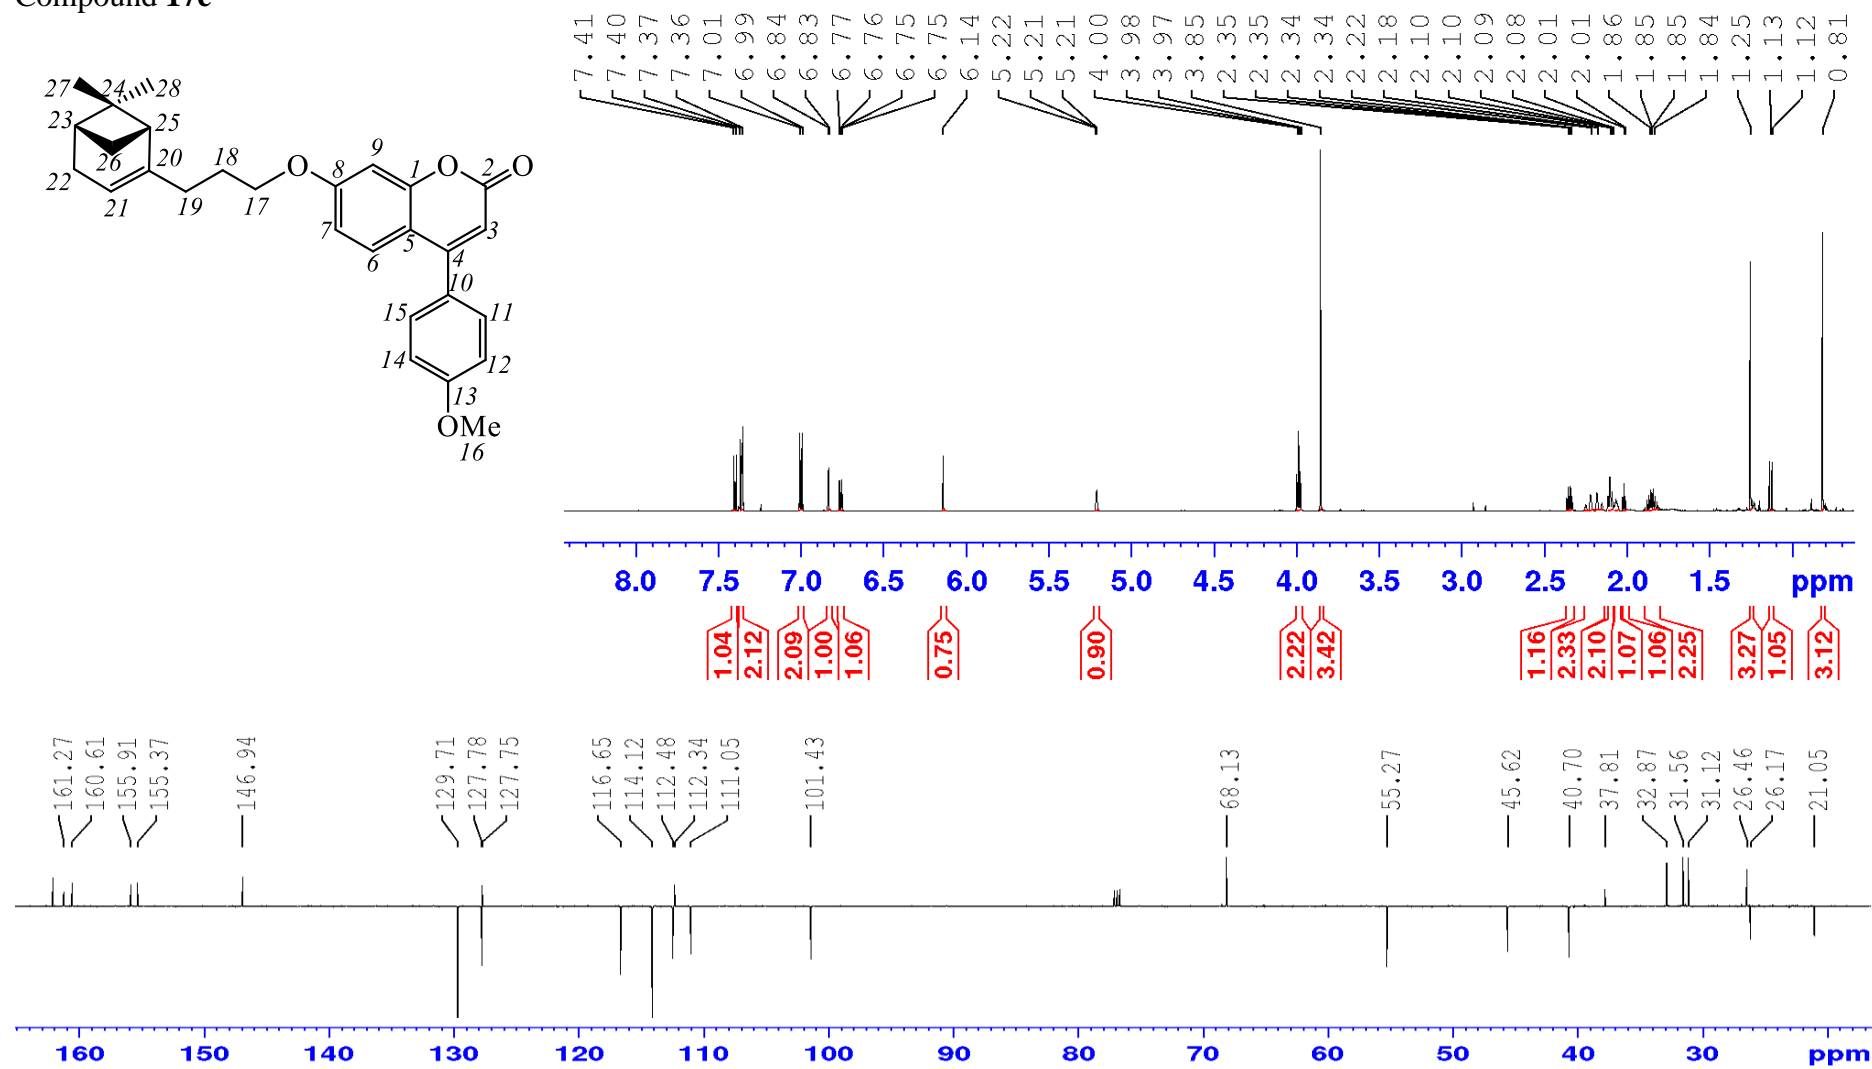

Compound **17f**

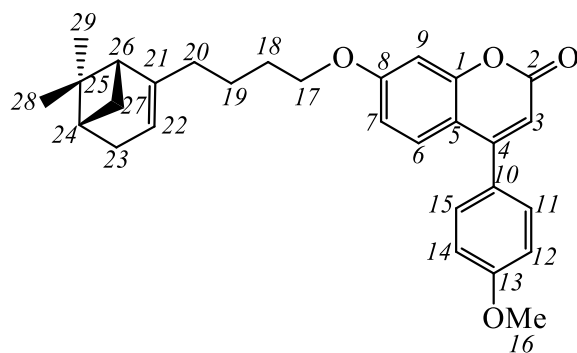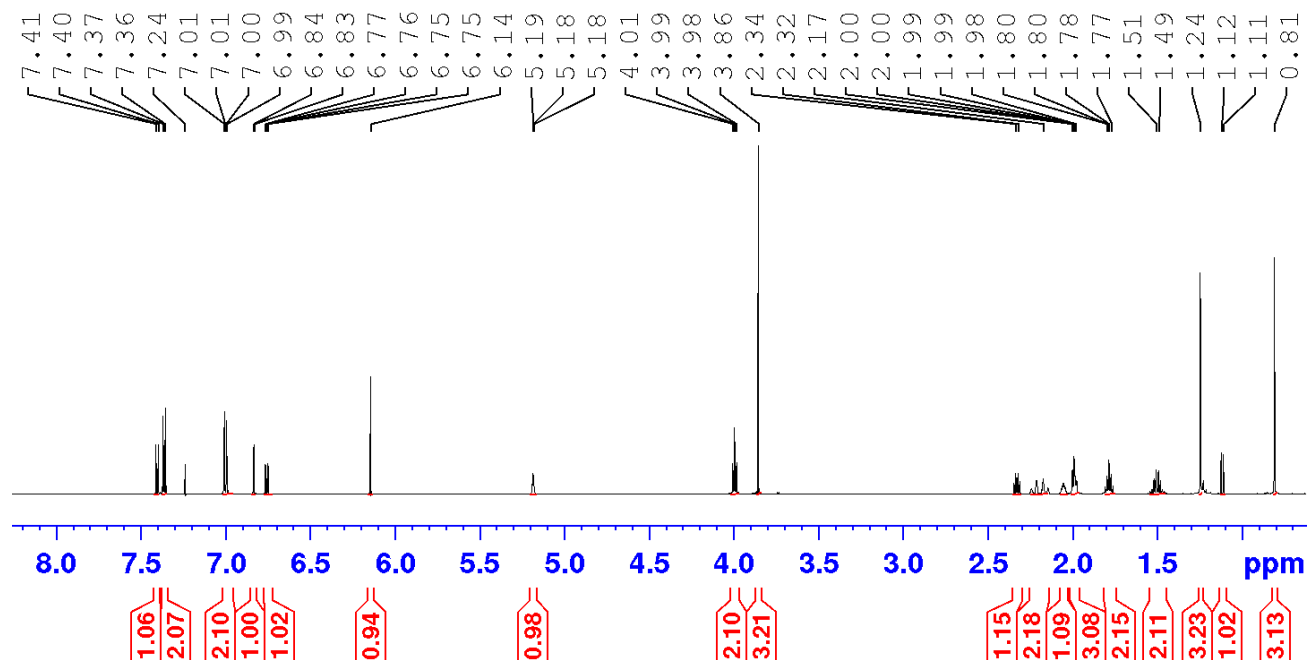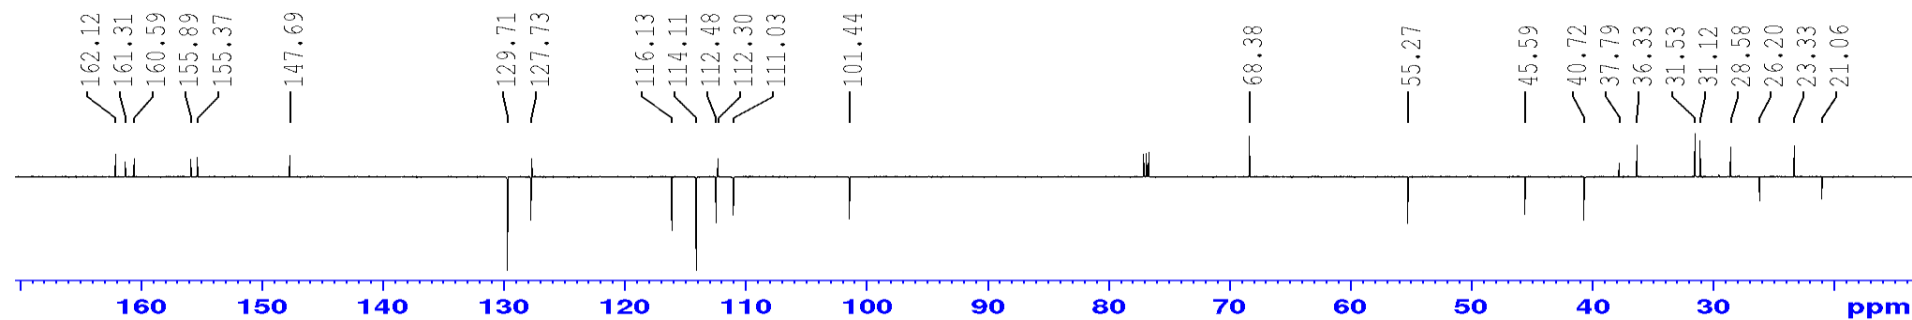

Compound **17g**

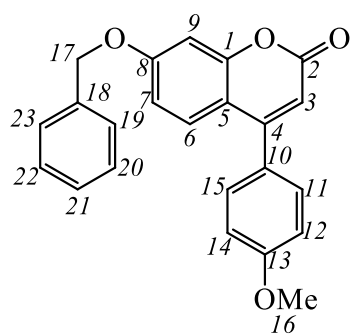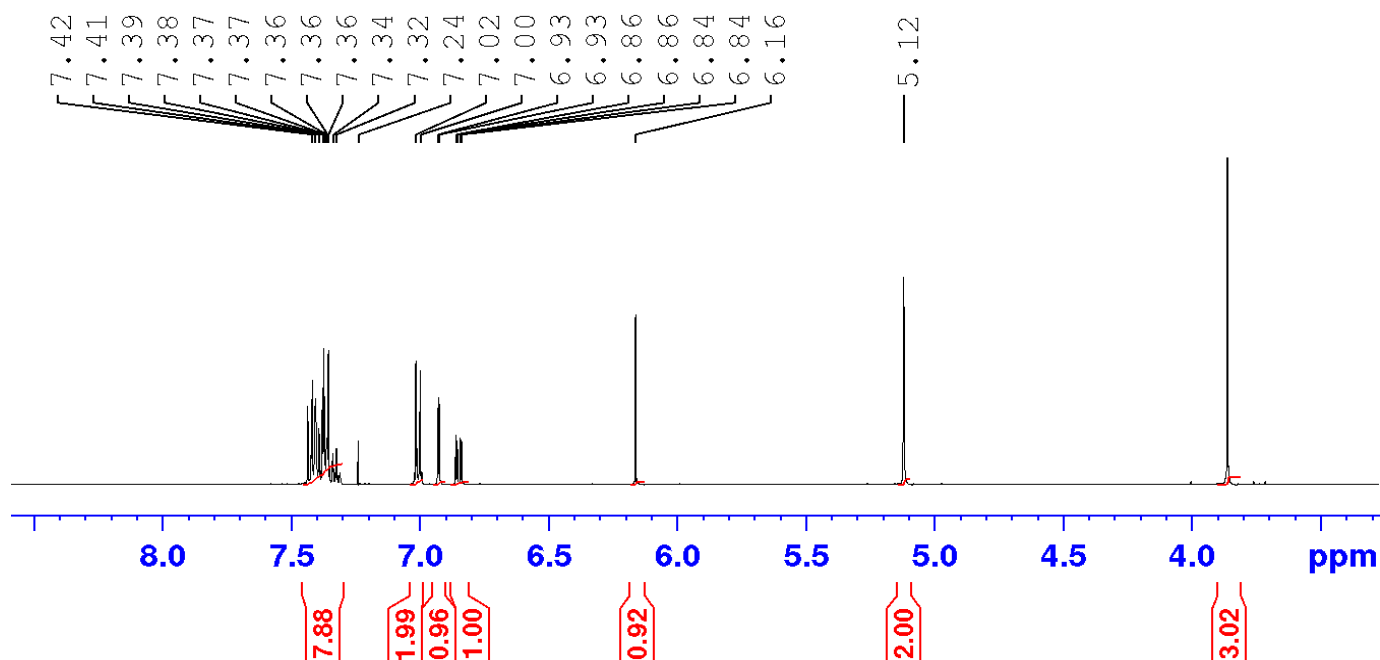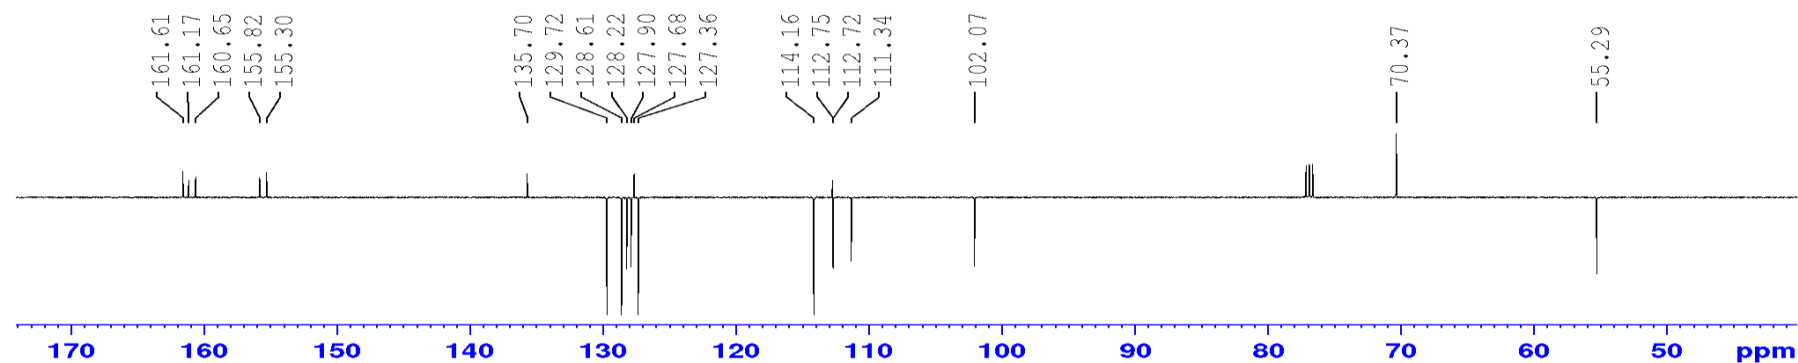



# Compound 21

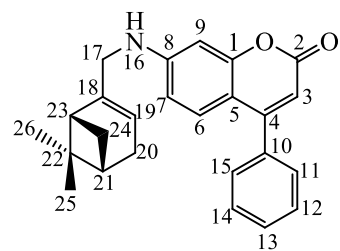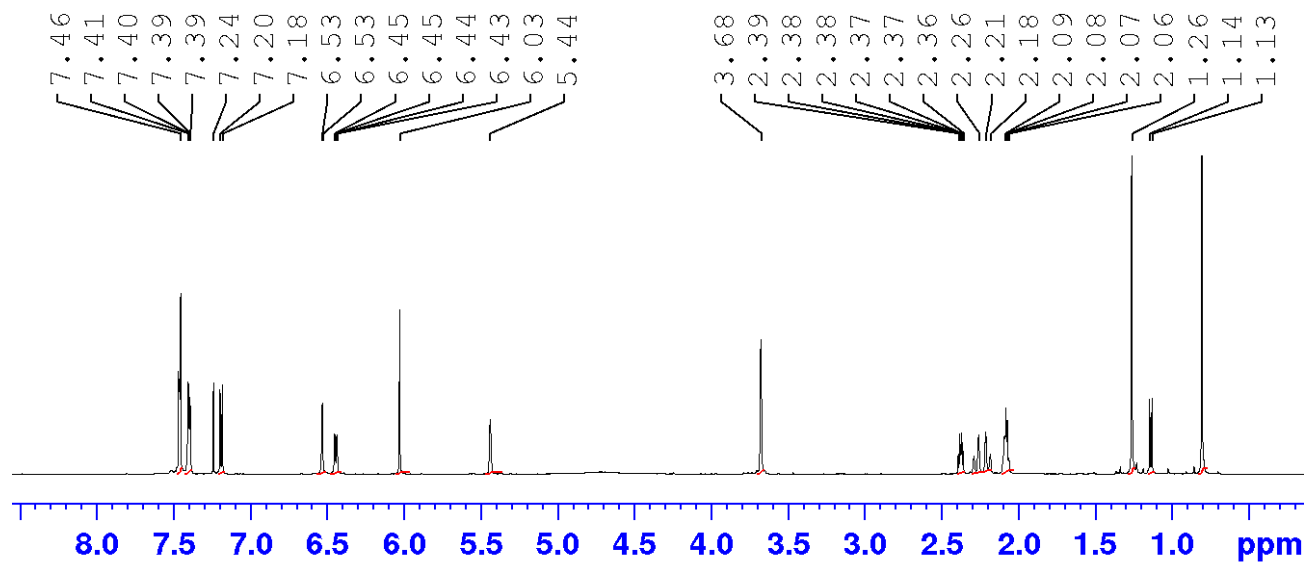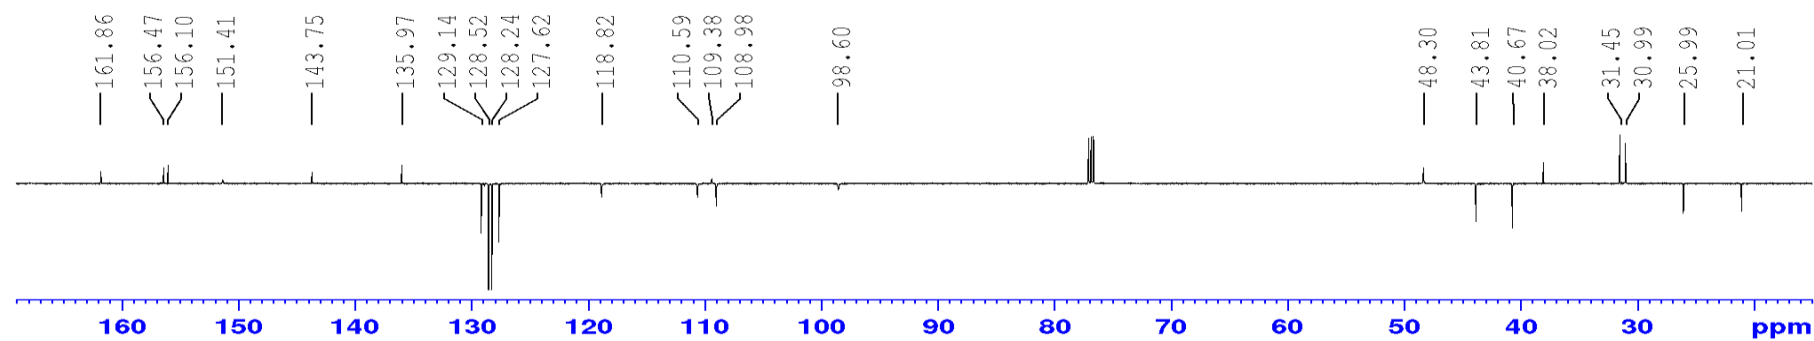

Compound **22**

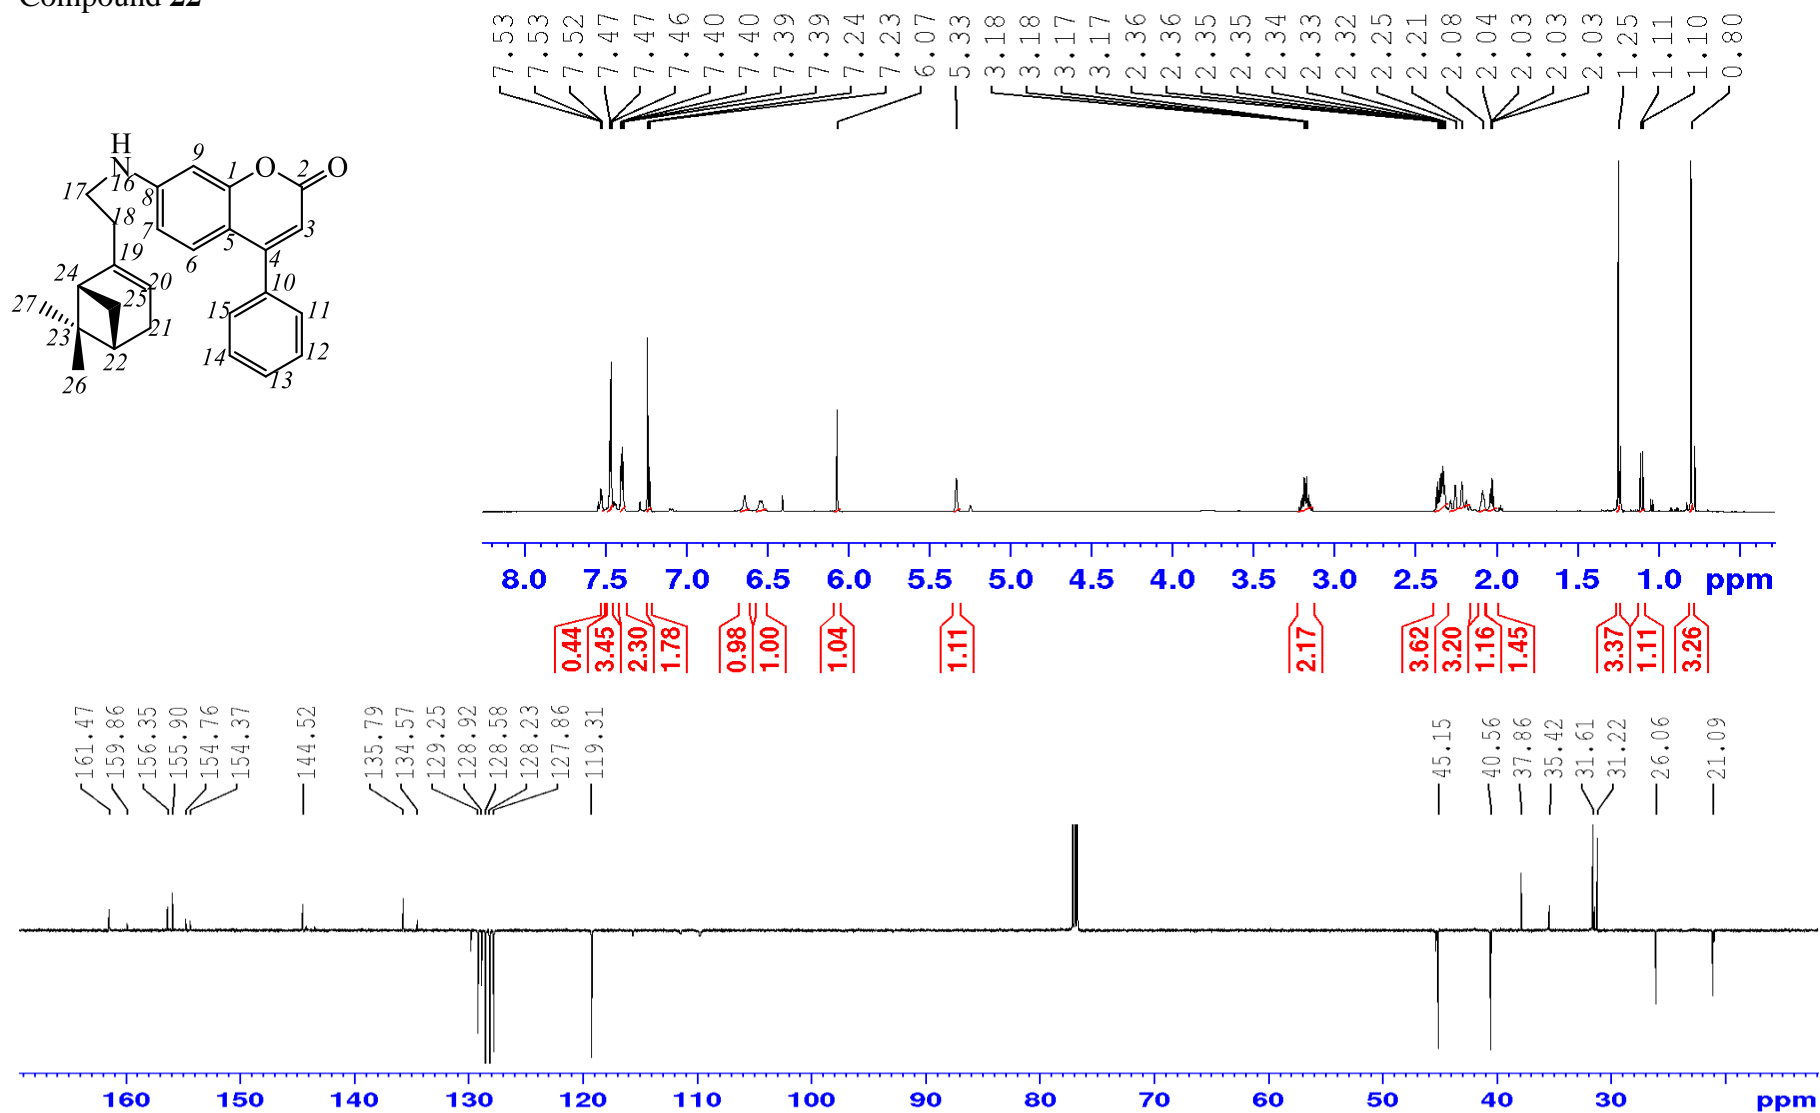

*Correspondence of ligands' pharmacophores to the pharmacophore features of the binding site*

The structural descriptors of the studied ligands are presented in Tables SM-1-3: M – molecular weight, AlogP – the predicted octanol/water partial coefficient based on atomic contributions shows the value of the lipophilicity of the compounds under consideration, PSA – polar surface area or the sum of the surface of all polar atoms, according to (Pajouhesh and Lenz 2005) PSA value greater than 140 Å<sup>2</sup> characteristic of compounds with poor membrane permeability, HBD and HBA are donor atoms and hydrogen bond acceptors, respectively. pIC<sub>50</sub> – -lg[IC<sub>50</sub>]; c; SI is the selectivity index, the ratio of cytotoxicity to inhibitory activity. Based on the SI value of the connection, the leaders are colored green. Matched ligand sites – the ratio of ligands to the pharmacophore profile of the binding site: A – the presence of a hydrogen bond acceptor; R – the presence of an aromatic ring; HP – the presence of a hydrophobic fragment; D – the presence of a fragment – a donor of the hydrogen bond.

**Table S1.** Analysis of structural descriptors and pharmacophoric features of the ligand as a function of linker length.

| ID structures                                                                       |            | -(CH <sub>2</sub> ) <sub>n</sub> | M, Da | AlogP | PSA,<br>Å <sup>2</sup> | HBD | HBA | Matched ligand sites                     | pIC <sub>50</sub> | SI           |
|-------------------------------------------------------------------------------------|------------|----------------------------------|-------|-------|------------------------|-----|-----|------------------------------------------|-------------------|--------------|
| 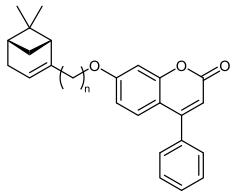   | <b>14b</b> | 1                                | 372.5 | 5.65  | 39.44                  | 0   | 3   | 3: <b>A-1</b> ; <b>R-2</b>               | 4.75              | <b>32.8</b>  |
|                                                                                     | <b>14d</b> | 2                                | 386.5 | 5.97  | 39.44                  | 0   | 3   | 3: <b>HP-1</b> ; <b>R-2</b>              | 4.08              | 7.9          |
|                                                                                     | <b>14e</b> | 3                                | 400.5 | 6.43  | 39.44                  | 0   | 3   | 3: <b>HP-1</b> ; <b>R-2</b>              | <b>5.12</b>       | <b>192.6</b> |
|                                                                                     | <b>14f</b> | 4                                | 414.5 | 6.89  | 39.44                  | 0   | 3   | < 3                                      | 3.95              | <b>11.4</b>  |
|    | <b>15b</b> | 1                                | 451.2 | 6.40  | 39.44                  | 0   | 3   | 3: <b>A-1</b> ; <b>R-2</b>               | 4.82              | 3.0          |
|                                                                                     | <b>15d</b> | 2                                | 465.4 | 6.72  | 39.44                  | 0   | 3   | 3: <b>HP-1</b> ; <b>R-2</b>              | < 4.7             | < 0.8        |
|                                                                                     | <b>15e</b> | 3                                | 479.4 | 7.18  | 39.44                  | 0   | 3   | 3: <b>HP-1</b> ; <b>R-2</b>              | < 4.9             | < 1          |
|                                                                                     | <b>15f</b> | 4                                | 493.4 | 7.64  | 39.44                  | 0   | 3   | < 3                                      | 5.02              | 9.6          |
|   | <b>16b</b> | 1                                | 390.5 | 5.86  | 39.44                  | 0   | 3   | 3: <b>A-1</b> ; <b>R-2</b>               | 3.99              | 2.9          |
|                                                                                     | <b>16e</b> | 3                                | 418.5 | 6.64  | 39.44                  | 0   | 3   | 3: <b>HP-1</b> ; <b>R-2</b>              | 3.96              | 9.0          |
|                                                                                     | <b>16f</b> | 4                                | 432.5 | 7.09  | 39.44                  | 0   | 3   | < 3                                      | 5.03              | <b>11.8</b>  |
|  | <b>17b</b> | 1                                | 402.5 | 5.64  | 48.67                  | 0   | 4   | 3: <b>A-1</b> ; <b>R-2</b>               | < 4.9             | < 1          |
|                                                                                     | <b>17d</b> | 2                                | 416.5 | 5.96  | 48.67                  | 0   | 4   | 3: <b>HP-1</b> ; <b>R-2</b>              | 4.19              | <b>10.6</b>  |
|                                                                                     | <b>17f</b> | 4                                | 444.5 | 6.87  | 48.67                  | 0   | 4   | 3: <b>HP-1</b> ; <b>R-2</b>              | < 4.9             | < 1          |
|  | <b>21</b>  | 1                                | 371.5 | 5.48  | 42.24                  | 1   | 2   | 4: <b>D-1</b> ; <b>HP-1</b> ; <b>R-2</b> | < 4.9             | < 1.5        |
|                                                                                     | <b>22</b>  | 2                                | 385.5 | 5.80  | 42.24                  | 1   | 2   | 3: <b>HP-1</b> ; <b>R-2</b>              | 4.10              | 6.0          |

**Table S2.** Analysis of structural descriptors and pharmacophoric features of the ligand as a function of the nature of the substituent.

| ID structures                                                                     |     | -R                | M, Da | AlogP | PSA   | HBD | HBA | pIC <sub>50</sub> | SI    | Matched ligand sites |
|-----------------------------------------------------------------------------------|-----|-------------------|-------|-------|-------|-----|-----|-------------------|-------|----------------------|
| 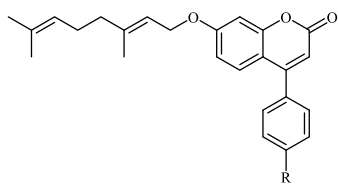 | 14a | -H                | 374.5 | 6.81  | 39.44 | 0   | 3   | 4.17              | 11.9  | < 3                  |
|                                                                                   | 15a | -Br               | 453.4 | 7.55  | 39.44 | 0   | 3   | 5.05              | 1.0   | < 3                  |
|                                                                                   | 16a | -F                | 392.5 | 7.01  | 39.44 | 0   | 3   | 4.32              | 5.8   | < 3                  |
|                                                                                   | 17a | -OCH <sub>3</sub> | 404.5 | 6.79  | 48.67 | 0   | 4   | 4.23              | 5.8   | < 3                  |
|  | 14g | -H                | 328.4 | 5.10  | 39.44 | 0   | 3   | < 2.80            | < 0.9 | < 3                  |
|                                                                                   | 15g | -Br               | 407.3 | 5.85  | 39.44 | 0   | 3   | 4.08              | 3.2   | 3: <b>R – 3</b>      |
|                                                                                   | 16g | -F                | 346.4 | 5.30  | 39.44 | 0   | 3   | 3.16              | < 0.9 | 3: <b>R – 3</b>      |
|                                                                                   | 17g | -OCH <sub>3</sub> | 358.4 | 5.08  | 48.67 | 0   | 4   | < 4.77            | < 1   | 3: <b>R – 3</b>      |

**Table S3.** Analysis of structural descriptors and pharmacophoric features of the different stereoisomers.

| ID structures                                                                     | -R<br>-R'                                                                                                                       | M, Da | AlogP | PSA   | HBD | HBA | pIC <sub>50</sub> | SI     | Matched ligand sites           |
|-----------------------------------------------------------------------------------|---------------------------------------------------------------------------------------------------------------------------------|-------|-------|-------|-----|-----|-------------------|--------|--------------------------------|
| 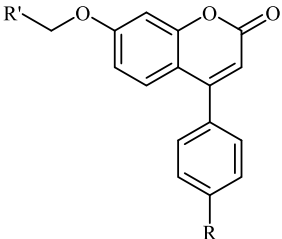 | <b>14b</b><br>R = H<br>R' =                    | 372.5 | 5.65  | 39.44 | 0   | 3   | 4.75              | 32.8   | 3: <b>A - 1</b> ; <b>R - 2</b> |
|                                                                                   | <b>14c</b><br>R' =                             | 372.5 | 5.65  | 39.44 | 0   | 3   | 3.63              | 3.5    | < 3                            |
|                                                                                   | <b>15b</b><br>R = Br<br>R' =                   | 451.2 | 6.40  | 39.44 | 0   | 3   | 4.82              | 3.0    | 3: <b>A - 1</b> ; <b>R - 2</b> |
|                                                                                   | <b>15c</b><br>R' =                             | 451.2 | 6.40  | 39.44 | 0   | 3   | 4.31              | 1.9    | < 3                            |
|                                                                                   | <b>16b</b><br>R = F<br>R' =                   | 390.5 | 5.86  | 39.44 | 0   | 3   | 3.99              | 2.9    | 3: <b>A - 1</b> ; <b>R - 2</b> |
|                                                                                   | <b>16c</b><br>R' =                           | 390.5 | 5.86  | 39.44 | 0   | 3   | 4.84              | 1.4    | < 3                            |
|                                                                                   | <b>17b</b><br>R = -OCH <sub>3</sub><br>R' =  | 402.5 | 5.64  | 48.67 | 0   | 4   | < 4.9             | < 1    | 3: <b>A - 1</b> ; <b>R - 2</b> |
|                                                                                   | <b>17c</b><br>R' =                           | 402.5 | 5.64  | 48.67 | 0   | 4   | < 4.8             | < 0.98 | < 3                            |

## Molecular docking

**Table S4.** Molecular docking results.

| ID compounds | pIC50 | Pose (max 20) | GC     | IDF      | H-bond | Other interactions                                                                                                                                           |
|--------------|-------|---------------|--------|----------|--------|--------------------------------------------------------------------------------------------------------------------------------------------------------------|
| <b>14a</b>   | 4.17  | 17            | -8.70  | -3108.00 | None   | A: Phe488 – $\pi$ - $\pi$<br>A: Phe140 – HP<br>B: Phe140 – $\pi$ - $\pi$<br>D: Phe137; Leu138; Met396; Phe488 – HP<br>D: Phe140 – $\pi$ - $\pi$              |
| <b>14b</b>   | 4.75  | 12            | -9.27  | -3108.97 | None   | A: Phe488 – $\pi$ - $\pi$<br>B: Phe488 – $\pi$ - $\pi$<br>B: Phe140; Leu141 – HP<br>D: Phe488 – $\pi$ - $\pi$                                                |
| <b>14c</b>   | 3.63  | 9             | -8.31  | -3106.42 | None   | A: Phe488 – $\pi$ - $\pi$<br>B: Phe488 – $\pi$ - $\pi$<br>D: Phe137; Leu138; Phe140; Leu141 – HP                                                             |
| <b>14d</b>   | 4.08  | 16            | -9.05  | -3106.64 | None   | D: Phe488 – $\pi$ - $\pi$<br>D: Phe137; Leu138; Phe140; Leu141 – HP                                                                                          |
| <b>14e</b>   | 5.12  | 17            | -10.26 | -3108.15 | None   | A: Phe140 – HP<br>B: Phe140 – $\pi$ - $\pi$<br>B: Phe488 – $\pi$ - $\pi$<br>B: Phe137; Leu138; Phe140; Leu141 – HP<br>D: Phe137; Leu138; Phe140; Leu141 – HP |
| <b>14f</b>   | 3.95  | 17            | -9.22  | -3107.32 | None   | A: Phe488 – $\pi$ - $\pi$<br>B: Phe488 – $\pi$ - $\pi$                                                                                                       |
| <b>14g</b>   | 2.80  | 8             | -7.60  | -3104.82 | None   | A: Phe140; Phe488 – $\pi$ - $\pi$<br>A: Met396 – HP<br>D: Phe488 – $\pi$ - $\pi$                                                                             |
| <b>15a</b>   | 5.05  | 17            | -9.40  | -3110.11 | None   | A: Phe488 – $\pi$ - $\pi$<br>A: Phe137; Phe140 – HP                                                                                                          |

|            |      |    |       |          |                        |                                                                                                                                                 |
|------------|------|----|-------|----------|------------------------|-------------------------------------------------------------------------------------------------------------------------------------------------|
|            |      |    |       |          |                        | B: Phe140; Leu141 – HP<br>B: Phe488 – $\pi$ - $\pi$<br>D: Phe140; Phe488 – $\pi$ - $\pi$                                                        |
| <b>15b</b> | 4.82 | 14 | -9.70 | -3108.88 | None                   | A: Phe488 – $\pi$ - $\pi$<br>A: Phe137; Phe140 – HP<br>B: Phe140; Leu141 – HP<br>B: Phe488 – $\pi$ - $\pi$<br>D: Phe140; Phe488 – $\pi$ - $\pi$ |
| <b>15c</b> | 4.30 | 19 | -8.14 | -3106.38 | A: Asp489              | D: Phe137; Leu138; Phe140 – HP                                                                                                                  |
| <b>15d</b> | 4.70 | 16 | -9.47 | -3110.81 | A: Phe488<br>Asp489    | A: Phe137 – HP<br>B: Phe488 – $\pi$ - $\pi$<br>B: Phe137; Leu138; Phe140 – HP                                                                   |
| <b>15e</b> | 4.90 | 12 | -8.73 | -3109.03 | A: Phe488<br>Asp489    | A: Phe488 – $\pi$ - $\pi$<br>B: Phe137; Leu138; Phe140 – HP                                                                                     |
| <b>15f</b> | 5.02 | 12 | -9.72 | -3110.20 | A: Phe488<br>D: Asp486 | A: Phe140 – HP<br>B: Phe488 – HP<br>D: Phe137, Phe138 – HP.<br>D: Phe488 – $\pi$ - $\pi$                                                        |
| <b>15g</b> | 4.08 | 8  | -8.99 | -3109.05 | None                   | A: Phe488 – $\pi$ - $\pi$<br>B: Phe140; Phe488 – $\pi$ - $\pi$<br>B: Phe140; Leu141 – HP<br>D: Phe140; Phe488 – $\pi$ - $\pi$                   |
| <b>16a</b> | 4.32 | 15 | -8.86 | -3108.25 | A: Asp489<br>Phe488    | A: Lys498 – $\pi$ -cation<br>B: Phe137; Phe140; Phe488 – HP<br>D: Phe140; Phe488 – HP                                                           |
| <b>16b</b> | 3.99 | 17 | -9.03 | -3107.49 | None                   | A: Phe488 – $\pi$ - $\pi$<br>D: Phe488 – $\pi$ - $\pi$<br>D: Phe137; Leu138; Phe140 – HP                                                        |
| <b>16c</b> | 4.84 | 6  | -9.07 | -3109.40 | None                   | A: Phe488 – $\pi$ - $\pi$<br>A: Phe137; Phe140 – HP<br>B: Phe140; Leu141 – HP                                                                   |



|            |      |    |       |          |                                     |                                                                                                                                                    |
|------------|------|----|-------|----------|-------------------------------------|----------------------------------------------------------------------------------------------------------------------------------------------------|
|            |      |    |       |          |                                     | D: Phe140; Phe488 – $\pi$ - $\pi$                                                                                                                  |
| <b>16e</b> | 3.96 | 17 | -9.20 | -3107.86 | None                                | A: Phe140 – $\pi$ - $\pi$<br>A: Phe140 – HP<br>B: Met396 – HP<br>B: Phe140 – $\pi$ - $\pi$<br>D: Phe137; Leu138; Phe140 – HP                       |
| <b>16f</b> | 5.03 | 13 | -9.99 | -3108.68 | None                                | A: Phe488 – $\pi$ - $\pi$<br>B: Phe140 – $\pi$ - $\pi$<br>D: Phe140 – $\pi$ - $\pi$<br>D: Phe137; Leu138; Phe140 – HP                              |
| <b>16g</b> | 3.20 | 11 | -8.17 | -3107.30 | None                                | A: Phe140; Phe488 – $\pi$ - $\pi$<br>B: Phe488 – $\pi$ - $\pi$<br>D: Phe488 – $\pi$ - $\pi$<br><br>D: Phe137; Leu138; Phe140 – HP                  |
| <b>17a</b> | 4.20 | 13 | -8.97 | -3109.54 | A: Asp489<br>Phe488                 | B: Phe488 – $\pi$ - $\pi$<br>B: Phe137; Leu138; Phe140 – HP                                                                                        |
| <b>17b</b> | 4.90 | 14 | -9.16 | -3108.81 | None                                | B: Phe140; Phe488 – $\pi$ - $\pi$<br>B: Phe137; Leu138; Phe140 – HP<br>D: Phe137; Leu138; Phe140 – HP                                              |
| <b>17c</b> | 4.80 | 10 | -9.59 | -3109.31 | None                                | A: Phe140; Phe488 – $\pi$ - $\pi$<br>B: Phe137; Leu138; Phe140 – HP<br>D: Phe140; Phe488 – $\pi$ - $\pi$<br>D: Phe137; Leu138; Phe140; Met396 – HP |
| <b>17d</b> | 4.19 | 18 | -8.53 | -3107.42 | A: Phe488<br>A: Asp489              | A: Lys498 – $\pi$ -cation<br>D: Phe488 – $\pi$ - $\pi$<br>D: Phe137; Leu138; Phe140; Leu141 – HP                                                   |
| <b>17f</b> | 4.97 | 18 | -9.86 | -3110.34 | A: Phe488<br>A: Asp489<br>B: Lys498 | B: Pro484 – HP<br>D: Phe488 – HP                                                                                                                   |

|            |      |    |        |          |           |                                                                                                                                                 |
|------------|------|----|--------|----------|-----------|-------------------------------------------------------------------------------------------------------------------------------------------------|
| <b>17g</b> | 4.80 | 11 | -9.72  | -3109.89 | None      | A: Phe488 – $\pi$ - $\pi$<br>B: Phe488 – $\pi$ - $\pi$<br>D: Phe137; Leu138; Phe140 – HP                                                        |
| <b>21</b>  | 4.90 | 16 | -10.36 | -3106.98 | B: Phe137 | A: Phe488 – $\pi$ - $\pi$<br>B: Phe488 – $\pi$ - $\pi$<br>B: Phe137; Leu138; Phe140 – HP                                                        |
| <b>22</b>  | 4.10 | 17 | -8.86  | -3106.99 | None      | A: Phe140 – HP<br>A: Phe488 – $\pi$ - $\pi$<br>B: Phe488 – $\pi$ - $\pi$<br>D: Phe137; Leu138; Phe140; Leu141 – HP<br>D: Phe140 – $\pi$ - $\pi$ |

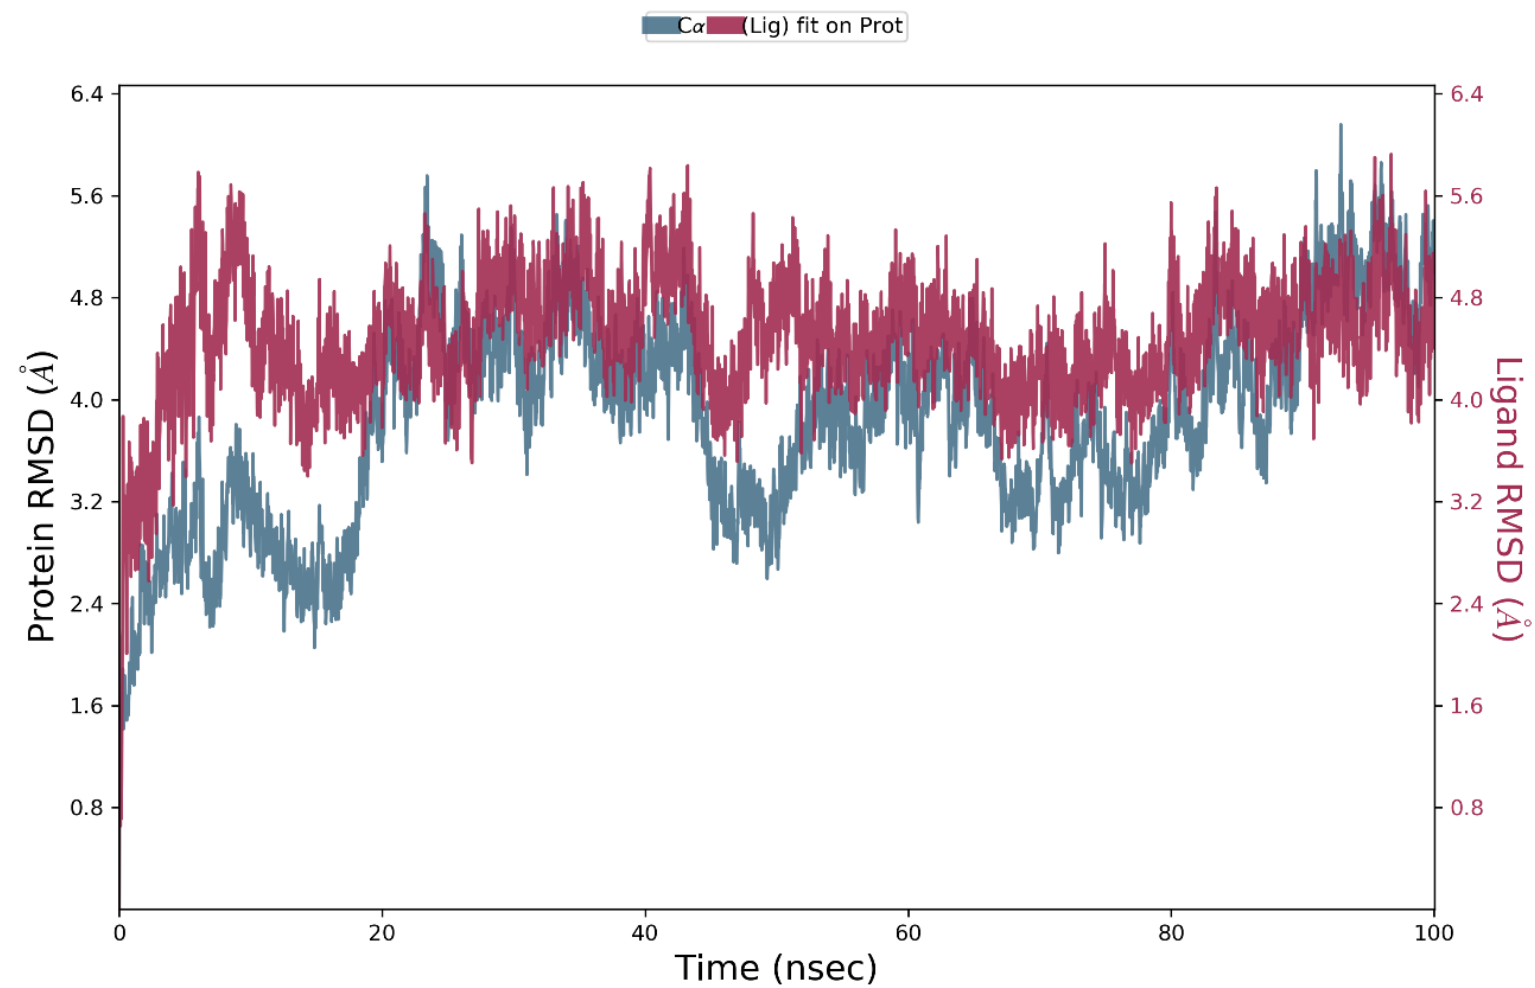

**Figure S1.** RMSD fluctuations.

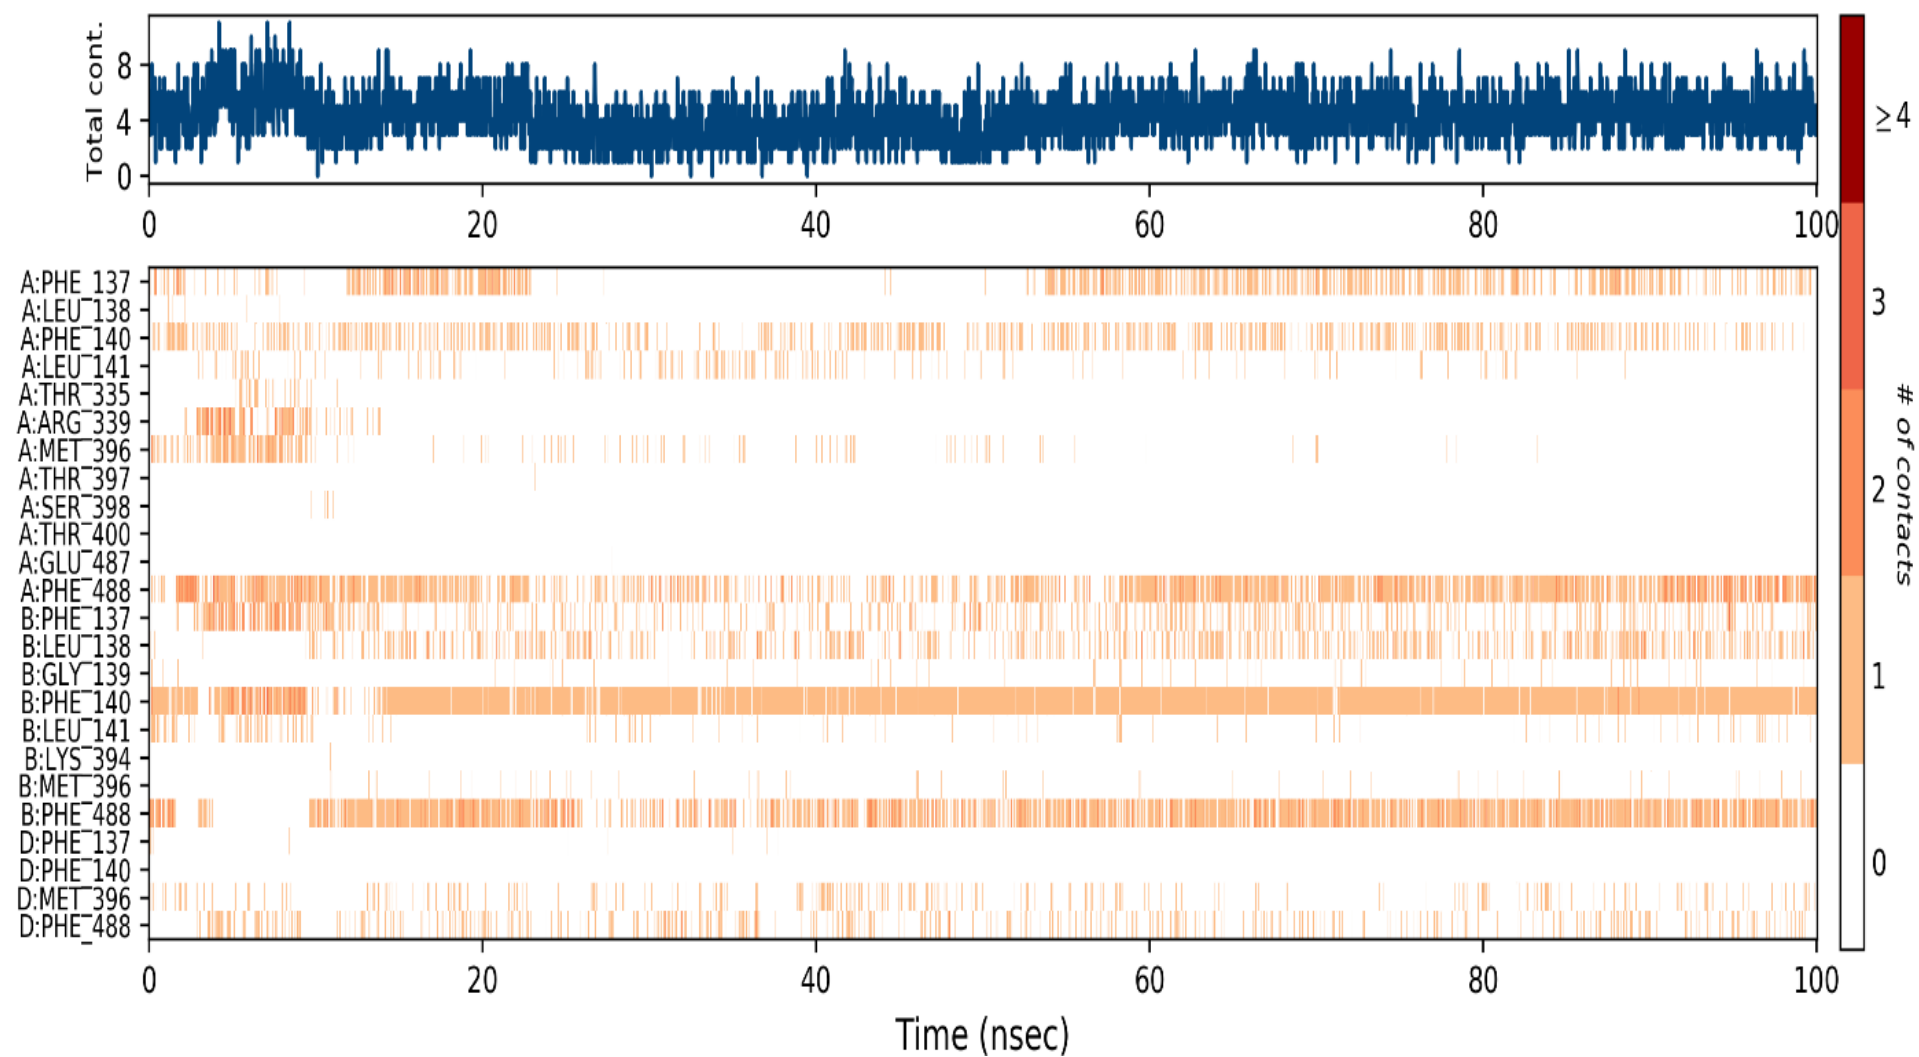

**Figure S2.** The total number of protein-ligand contacts.
